10 **SUMMARY**

11 Using the ciliary model system *Chlamydomonas*, we find Arp2/3 complex-mediated  
12 endocytosis is needed to reclaim cell body plasma membrane for early ciliary assembly.

13

14 **ABSTRACT**

15 Ciliary assembly, trafficking, and regulation are dependent on microtubules, but the  
16 mechanisms of ciliary assembly also require the actin cytoskeleton. Here, we dissect subcellular  
17 roles of actin in ciliogenesis by focusing on actin networks nucleated by the Arp2/3 complex in  
18 the powerful ciliary model, *Chlamydomonas*. We find the Arp2/3 complex is required for the  
19 initial stages of ciliary assembly when protein and membrane are in high demand but cannot yet  
20 be supplied from the Golgi complex. We provide evidence for Arp2/3 complex-dependent  
21 endocytosis of ciliary proteins, an increase in endocytic activity upon induction of ciliary growth,  
22 and relocalization of plasma membrane proteins to newly formed cilia. Our data support a new  
23 model of ciliary protein and membrane trafficking during early ciliogenesis whereby proteins  
24 previously targeted to the plasma membrane are reclaimed by Arp2/3 complex-dependent  
25 endocytosis for initial ciliary assembly.

## 26 INTRODUCTION

27 The cilium of the unicellular, green alga *Chlamydomonas reinhardtii* has long been used  
28 as a model due to its structural and mechanistic conservation relative to mammalian cilia. Cilia  
29 consist of microtubules that extend from the cell surface and are ensheathed in plasma  
30 membrane. Their assembly relies on microtubule dynamics and trafficking of protein and  
31 membrane (Nachury et al., 2010), as well as intraflagellar transport (IFT), a motor-based  
32 transport system that moves tubulin and other cargo through the cilium (Pedersen and  
33 Rosenbaum, 2008).

34 Although cilia are composed of microtubules and depend on them for assembly, the  
35 mechanisms governing ciliary maintenance and assembly extend to other cytoskeletal proteins,  
36 like actin. The microtubule organizing center, the centrosome, from which cilia are nucleated  
37 functions as an actin organizer (Farina et al., 2016; Inoue et al., 2019). In mammalian cells,  
38 cortical actin disruption results in increased ciliary length and percentage of ciliated cells (Kim et  
39 al., 2010; Park et al., 2008), and when ciliogenesis is triggered by serum starvation, preciliary  
40 vesicles are trafficked to the centriole where they fuse to form a ciliary vesicle around the  
41 budding cilium. In intracellular ciliogenesis, when Arp2/3 complex-branched actin is lost, vesicle  
42 fusion defects lead to depletion of preciliary vesicles at the centriole, suggesting a role for  
43 branched actin in intracellular ciliogenesis (Wu et al., 2018). Further, actin itself has been found  
44 within cilia, suggesting that actin is a key protein in ciliary maintenance and assembly (Kiesel et  
45 al., 2020).

46 *Chlamydomonas* cells are ideal for tackling the question of actin-dependent ciliary  
47 trafficking due to their lack of a cortical actin network and their ability to undergo consistent and  
48 robust ciliogenesis without requiring serum starvation. In *Chlamydomonas*, disruption of actin  
49 networks with Cytochalasin D resulted in short cilia (Dentler and Adams, 1992) and disruption  
50 with Latrunculin B (LatB), which sequesters monomers leading to filament depolymerization,  
51 resulted in short cilia and impaired regeneration (Avasthi et al., 2014; Jack et al., 2019).  
52 *Chlamydomonas* actin networks are required for accumulation of IFT machinery at the base of  
53 cilia and for entry of IFT material into cilia (Avasthi et al., 2014), as well as for trafficking of post-  
54 Golgi vesicles to cilia, synthesis of ciliary proteins, and organization of the ciliary gating region  
55 (Jack et al., 2019). Many advances in our understanding of the relationship between cilia and  
56 actin were discovered using *Chlamydomonas*.

57 The actin cytoskeleton of *Chlamydomonas* contains two actin genes: *IDA5*, a  
58 conventional actin with 91% sequence identity to human  $\beta$ -actin; and *NAP1*, a divergent actin  
59 that shares only 63% of its sequence with human  $\beta$ -actin (Hirono et al., 2003; Kato-Minoura et  
60 al., 1998). We consider NAP1 to be an actin-like protein as opposed to an actin related protein  
61 (ARP) because it has a higher sequence identity to actin than to conventional ARPs and  
62 because it is able to functionally compensate for the conventional IDA5 (Jack et al., 2019;  
63 Onishi et al., 2019, 2018, 2016). Under normal, vegetative conditions, IDA5 is the primary actin  
64 expressed, but when cells are treated with LatB, the LatB-insensitive NAP1 is upregulated  
65 (Hirono et al., 2003; Onishi et al., 2018, 2016). This separability of the two actins led to the  
66 discovery that they can compensate for each other in ciliary maintenance and assembly (Jack et  
67 al., 2019). Studies of actin's role in ciliary assembly used global disruption, knocking out either  
68 one of the filamentous actins or acutely knocking out both, yet actin networks have diverse  
69 compositions and topologies that lead to specific subfunctions within cells.

70 Actin networks rely on actin binding proteins that contribute to the formation,  
71 arrangement, and function of the networks. One such actin binding protein is the Arp2/3  
72 complex, which nucleates branched or dendritic networks. These networks are often involved in  
73 membrane remodeling functions, like lamellipodia and endocytosis (Campellone and Welch,  
74 2010). The Arp2/3 complex consists of 7 subunits: Arp2, Arp3, and ARPC1-5 (**Figure S1**). Each  
75 subunit plays a specific role of varying importance in the nucleation process. ARPC2 and  
76 ARPC4 form the complex core and the primary contacts with the mother filament, Arp2 and

77 Arp3 serve as the first subunits of the daughter filament, and ARPC1 and ARPC3 play a role in  
78 nucleation but are not critical for branch formation (Gournier et al., 2001; Robinson et al., 2001).  
79 Each of these subunits is found in *Chlamydomonas*, but they have a range of sequence  
80 homologies compared to conventional Arp2/3 complexes (**Figure S1**). The ARPC5 subunit has  
81 yet to be found in *Chlamydomonas*. ARPC5 is thought to be important for the association of  
82 ARPC1 to the complex, but a mammalian complex lacking ARPC5 and ARPC1 maintains some  
83 nucleating and branching activity and is able to cross-link actin (Gournier et al., 2001).

84 Here, using the chemical inhibitor CK-666 to inhibit the nucleating function of the Arp2/3  
85 complex (Hetrick et al., 2013) and a genetic mutant of a critical Arp2/3 complex member,  
86 ARPC4 (Cheng et al., 2017; Li et al., 2019), we take a more delicate approach to investigating  
87 the actin's in ciliary assembly by separating different actin networks into their subfunctions  
88 based on topology. Specifically, we probe the involvement of actin networks nucleated by the  
89 Arp2/3 complex in ciliary maintenance and assembly. This approach in these cells has allowed  
90 us to propose a new model implicating a subset of filamentous actin in redistribution of  
91 membrane and proteins for the initial stages of ciliogenesis.

92

## 93 **RESULTS**

### 94 **Loss of Arp2/3 complex function inhibits normal regeneration and maintenance of cilia:**

95 To investigate the role of Arp2/3 complex-mediated actin networks in ciliary assembly,  
96 we used two tools. First, we used the chemical inhibitor CK-666 which blocks the nucleating  
97 ability of the Arp2/3 complex by binding the interface between Arp2 and Arp3 and locking the  
98 complex in an inactive state (Hetrick et al., 2013). The Arp2 and Arp3 subunits of the  
99 *Chlamydomonas* Arp2/3 complex are 75.1% and 61.5% similar to mammalian Arp2/3 complex  
100 respectively (**Figure S1**). This, along with the ability of CK-666 to recapitulate the effects of a  
101 genetic mutant of the Arp2/3 complex, suggest that CK-666 can target *Chlamydomonas* Arp2/3  
102 complex. Second, we obtained a loss of function mutant of the critical Arp2/3 complex member,  
103 ARPC4 from the *Chlamydomonas* Resource Center (Cheng et al., 2017; Li et al., 2019). The  
104 *arpc4* mutant was confirmed via PCR and further evaluated using a genetic rescue where a V5-  
105 tagged ARPC4 construct is expressed in *arpc4* mutant cells, *arpc4*:ARPC4-V5. This was  
106 confirmed via PCR, western blot, and immunofluorescence (**Figure S1C-E**). While we can  
107 confirm the presence of ARPC4-V5 with immunofluorescence, the actual localization of ARPC4-  
108 V5 is not discernable due to diffuse signal (**Figure S1E**). This could be because all ARPC4-V5  
109 in the cell is not being incorporated into active Arp2/3 complexes.

110 We probed the requirement for the Arp2/3 complex in maintenance of cilia by treating  
111 cells with CK-666 or the inactive control CK-689 for 2 hours until cilia reached a new steady  
112 state length. Consistent with previous results (Avasthi et al., 2014), CK-666 decreased ciliary  
113 length (**Figure 1A**). We saw no changes with the inactive CK-689 (**Figure 1A**) or when *arpc4*  
114 mutant cells lacking a functional Arp2/3 complex were treated with CK-666 (**Figure 1A**).  
115 Untreated *arpc4* mutant cells recapitulate the CK-666 result, showing decreased ciliary length  
116 when compared to wild-type cells (**Figure 1B**). This defect in ciliary length was rescuable with  
117 ARPC4-V5 (**Figure 1B**). Overall, this suggests the Arp2/3 complex is required for normal ciliary  
118 maintenance.

119 Next, we explored the involvement of the Arp2/3 complex in ciliary assembly where  
120 protein and membrane both from existing pools and from synthesis are in high demand (Diener  
121 et al., 2015; Jack et al., 2019; Nachury et al., 2010; Rohatgi and Snell, 2010; Wingfield et al.,  
122 2017). Cells were deciliated by low pH shock and allowed to synchronously regenerate cilia at  
123 normal pH (Lefebvre, 1995). *arpc4* mutant cells were slow to regenerate cilia, and roughly 60%  
124 of cells did not regrow cilia (**Figure 1C-D**). This phenotype was rescued by with ARPC4-V5  
125 (**Figure 1C-D**). Importantly, the most severe defect in assembly is in initial steps when existing  
126 protein and membrane are being incorporated into cilia.



127           The striking decrease in ciliary assembly is puzzling because loss of the Arp2/3  
128 complex, and therefore only a subset of actin filaments, results in a more dramatic phenotype  
129 than *nap1* mutants treated with LatB, which lack all filamentous actins (Jack et al., 2019).  
130 However, in *arpc4* mutant cells, a functional Arp2/3 complex never exists. In *nap1* mutant cells  
131 treated with LatB, treatment begins shortly after deciliation resulting in an acute perturbation.  
132 Further, LatB functions by sequestering actin monomers to promote filament disassembly, and  
133 the effects may not be immediate (Spector et al., 1989). Thus, there is likely a brief window  
134 where actin filaments can assert their initial role in ciliary regeneration before being  
135 depolymerized. To avoid this, we began LatB treatment in *nap1* mutants 30 minutes before  
136 deciliation, which allowed us to observe what happens when actin is not present immediately  
137 after deciliation. We see slightly decreased ciliary length consistent with the acute treatment but  
138 dramatically decreased percent ciliation, which is consistent with the *arpc4* mutant results  
139 (**Figure 1E-F**).

140           Treatment with CK-666, an Arp2/3 complex inhibitor, gives a similar result. In cells  
141 treated with CK-666 immediately following deciliation, the Arp2/3 complex may assert its role in  
142 assembly before being inhibited by CK-666. By pre-treating cells with CK-666 for 1 hour before  
143 deciliation, we can observe what happens when Arp2/3 complex function is lost immediately  
144 following deciliation. When we do so, we see a more dramatic defect in ciliary length and  
145 percent ciliation than we do with just acute CK-666 treatment (**Figure 1G-H**), suggesting the  
146 Arp2/3 complex is required for a very early initial step of assembly that occurs before we have a  
147 chance to treat the cells.  
148

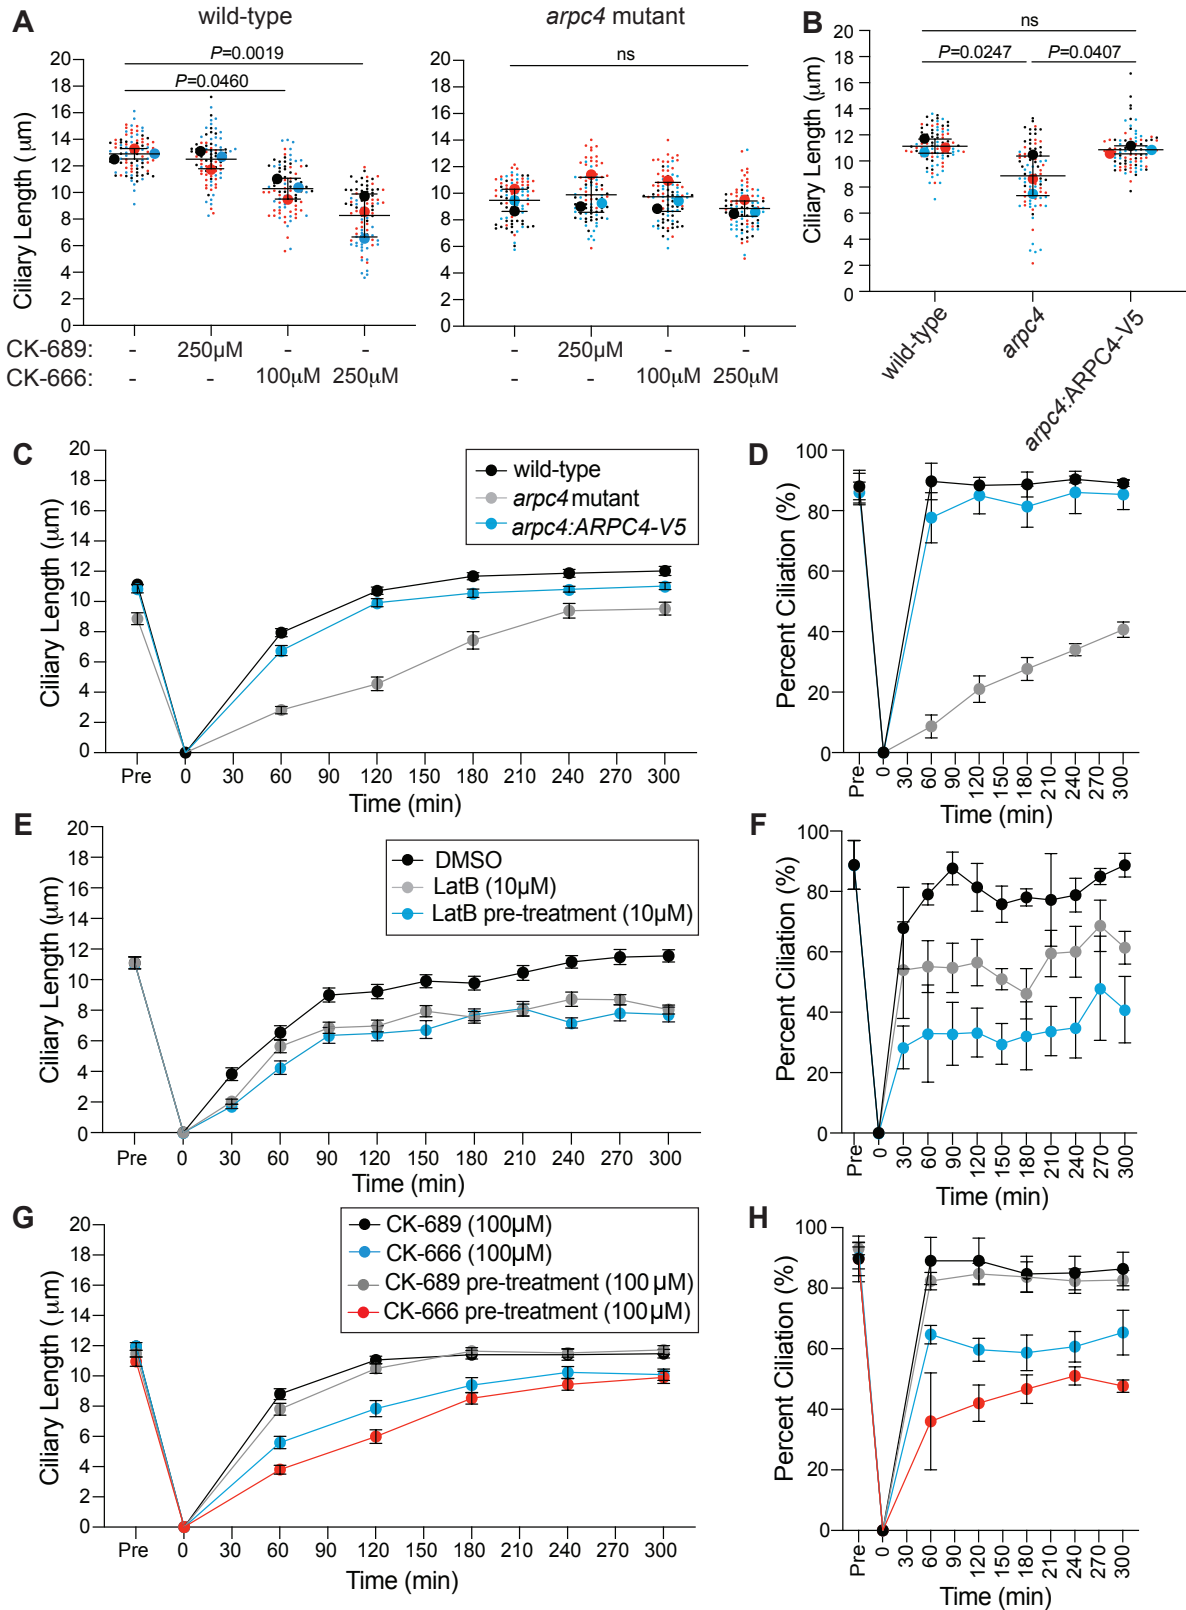

149  
150  
151  
152

**Figure 1. The Arp2/3 complex is required for normal ciliary maintenance and assembly.** **A)** Wild-type and *arpc4* mutant cells were treated with 100 $\mu$ M or 250 $\mu$ M CK-666 or the inactive CK-689 for 2 hours. Superplots show the mean ciliary lengths from 3 separate biological replicates with error bars representing standard deviation.  $n=30$  for each

153 treatment in each biological replicate. **B)** Wild-type cells, *arpc4* mutant cells, and *arpc4:ARPC4-V5* cells steady state  
154 cilia were also measured with no treatment. Superplots show the mean of 3 biological replicates with error bars  
155 representing standard deviation. n=30 for each strain in each biological replicate. **C-D)** Wild-type cells and *arpc4* mutant  
156 cells were deciliated using a pH shock, cilia were allowed to regrow and ciliary length (C) and percent ciliation (D) were  
157 determined. Means are displayed with error bars representing 95% confidence interval (C) or standard deviation (D).  
158 n=30 (C) or n=100 (D) for each strain and each time-point in 3 separate biological replicates. For every time point  
159 except 0 min, P<0.0001 for both length and percent ciliation. **E-F)** *nap1* mutant cells were pre-treated with 10 $\mu$ M LatB  
160 for 30 minutes before deciliation or treated with LatB upon the return to neutral pH following deciliation. Ciliary length  
161 (E) and percent ciliation (F) were determined for each time point. Error bars represent 95% confidence interval (E) or  
162 standard deviation (F). n=30 (E) or n=100 (F) for 3 separate experiments. For every time point P>0.0001 between  
163 DMSO and treated samples, except 30min (10 $\mu$ M LatB) which is ns. **G-H)** Wild-type cells were pre-treated with CK-  
164 666 or the inactive CK-689 (100 $\mu$ M) for 1 hour before deciliation of treated with CK-666 or the inactive CK-689 (100 $\mu$ M)  
165 following deciliation. Ciliary length (G) and percent ciliation were measured (H). Error bars represent 95% confidence  
166 interval (G) or standard deviation (H). n=30 (G) or n=100 (H) for 3 separate experiments.

167

### 168 **The Arp2/3 complex is required for the incorporation of existing membrane and proteins** 169 **for ciliary assembly:**

170 There are several actin-dependent steps of ciliary assembly, including incorporation of  
171 existing protein and membrane and synthesis and trafficking of new protein for cilia. Using a  
172 method to label nascent peptides, we found that loss of ARPC4 did not prevent upregulation of  
173 translation following deciliation (**Figure S3**). In this experiment, we halt translation and  
174 fluorescently label newly translated polypeptides. Wild-type and *arpc4* mutant cells were tested  
175 using this reaction either before deciliation, following deciliation and one hour of regrowth, or  
176 following deciliation and one hour of regrowth in cycloheximide (CHX), which inhibits protein  
177 synthesis by blocking the elongation step of protein translation. Wild-type and *arpc4* mutant  
178 cells displayed an increase in cell fluorescence following deciliation, especially around the  
179 nucleus, indicating an increase in protein synthesis following deciliation (**Figure S3**).  
180 Importantly, this increase in cell fluorescence was not significantly different between wild-type  
181 and *arpc4* mutant cells, suggesting loss of Arp2/3 complex function does not prevent  
182 upregulation of protein synthesis following deciliation. This also indicates *arpc4* mutant cells are  
183 aware their cilia were lost, as they respond with increased protein synthesis.

184 Given that *arpc4* mutant cells respond to deciliation with protein synthesis, another  
185 possible role of the Arp2/3 complex in ciliary assembly is the incorporation of a pool of existing  
186 proteins and membrane, which is actin-dependent (Jack et al., 2019). Further, disruption of  
187 Arp2/3 complex-mediated actin networks results in slow initial ciliary assembly, when it is likely  
188 that existing protein is being incorporated. We tested this by treating cells with cycloheximide  
189 (**Figure 2A, S2**) (Rosenbaum et al., 1969). Without protein synthesis, there is no trafficking or  
190 incorporation of new proteins. So, any ciliary growth we see is due to incorporation of existing  
191 protein alone. Normally, cells that are deciliated and treated with cycloheximide grow cilia to  
192 about half-length within 2 hours (**Figure 2B**). In *arpc4* mutant cells treated with cycloheximide,  
193 cilia display minimal growth; throughout a 5-hour period, only 6% of cells grew cilia (**Figure 2B**).  
194 This suggests the Arp2/3 complex is indispensable for incorporation of existing protein and  
195 membrane during ciliary assembly.

196 We suspected *arpc4* mutant cells either lacked the normal pool of ciliary precursor  
197 proteins or were unable to incorporate it. However, the inability of the genetic mutants to  
198 regenerate in cycloheximide prevents us from doing the typical studies testing new protein  
199 synthesis, precursor pool size, and new protein incorporation outlined in Jack et al. 2018 as they  
200 require regeneration in cycloheximide. To get around this, we used an acute perturbation,  
201 chemical inhibition in wild-type cells that have a normal ciliary precursor pool (as evidenced by  
202 their ability to grow to half-length in cycloheximide). Cells were deciliated and then CK-666 was  
203 added (in addition to cycloheximide) only for regrowth. Thus, the CK-666 could not affect  
204 precursor pool size. Cells treated with CK-666 and cycloheximide could not incorporate the  
205 precursor pool we know exists in these wild-type cells into cilia, while cilia of cells treated with

206 only cycloheximide or cycloheximide and the inactive control, CK-689 grew to half length  
 207 (**Figures 2C-D, S2**). This suggests the problem with incorporation in cells lacking a functional  
 208 Arp2/3 complex lies outside of availability of the precursor pool.  
 209

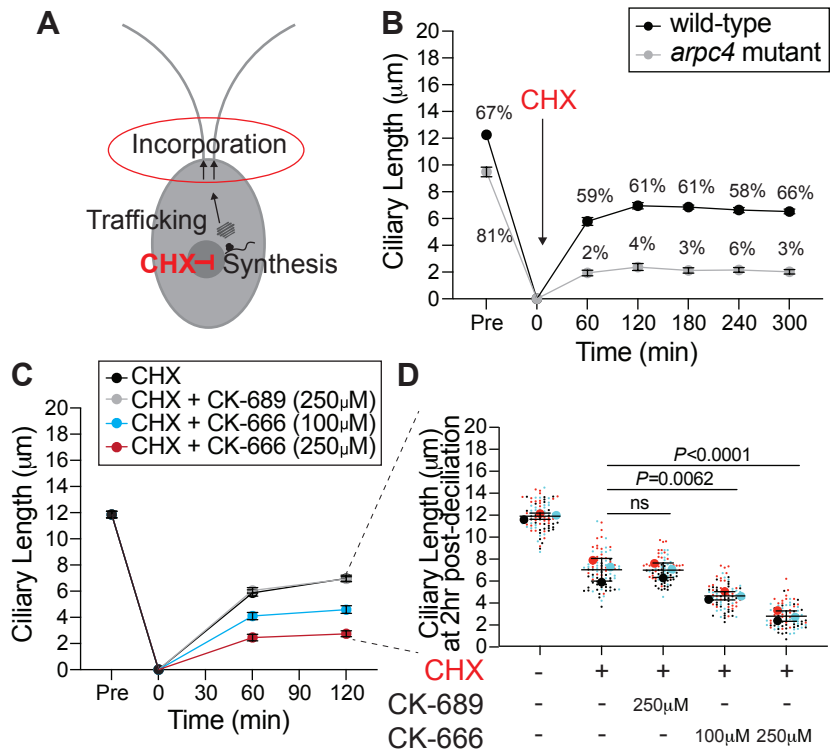

210  
 211 **Figure 2. The Arp2/3 complex is required for incorporation of existing protein during ciliary assembly.** **A)**  
 212 Treating cells with cycloheximide inhibits protein synthesis, which means only incorporation of existing protein into the  
 213 cilia is observed. **B)** Wild-type cells and *arpc4* mutants were deciliated and allowed to regrow in 10μM CHX. The  
 214 percentages above the lines represent the percent of cells with cilia at the indicated time points. The mean is shown  
 215 with error bars representing 95% confidence interval. n=30 for each strain and each time point in 3 separate  
 216 experiments. For every time point besides 0 min, P<0.0001 for both length and percent ciliation. **C)** Wild-type cells  
 217 were deciliated and then treated with a combination of 10μM cycloheximide (CHX) and CK-666 (100μM or 250μM) or  
 218 CK-689 (the inactive control, 250μM) at the same concentration during regrowth. The mean is shown with error bars  
 219 representing 95% confidence interval. n=30 for each strain and each time point in 3 separate experiments. At both 1  
 220 and 2 hour time points P<0.0001 for cells treated with CK-666 compared to wild-type cells, and ns for cells treated  
 221 with CK-689 compared to wild-type cells. **D)** The length of cilia after 2 hours of treatment and regrowth. Superplot  
 222 shows the mean of 3 separate experiments with error bars representing standard deviation. n=30 for each treatment  
 223 group 3 separate experiments.  
 224

### 225 Cilia of *arpc4* mutant cells resorb faster in the absence of the Golgi:

226 Because we see defects in ciliary assembly and maintenance when cells are likely  
 227 incorporating existing protein, and we know the protein needed for assembly is in excess due to  
 228 our acute perturbations with CK-666, we next investigated the membrane required for assembly.  
 229 This is of particular interest as the Arp2/3 complex is often involved in membrane remodeling.  
 230 Typically, the Golgi is thought to be the main source of membrane for cilia (Nachury et al., 2010;  
 231 Rohatgi and Snell, 2010), and ciliary membrane, membrane proteins, and some axonemal  
 232 proteins are transported in or attached to vesicles in cytosol (Wood and Rosenbaum, 2014). In  
 233 *Chlamydomonas*, this has been demonstrated by the ciliary shortening of cells treated with  
 234 Brefeldin A (BFA), a drug that causes Golgi collapse by interfering with ER to Golgi transport  
 235 (Dentler, 2013). To determine if the Arp2/3 complex is involved in trafficking of new protein from  
 236 the Golgi to cilia, we examined the Golgi following deciliation using transmission electron  
 237 microscopy in *arpc4* mutants (**Figure S4A**). The Golgi appeared grossly normal, had the same

238 number of cisternae, and did not show an accumulation of post-Golgi membrane as previously  
 239 reported when perturbing filamentous actin (Jack et al., 2019) (**Figures S4A-B**).

240 Alternative pathways for delivery of ciliary material have also been found in  
 241 *Chlamydomonas*. In one experiment, surface proteins were biotinylated and then cells were  
 242 deciliated, so the membrane and proteins within cilia were lost. When cilia were allowed to  
 243 regrow, biotinylated proteins were found within the new cilia suggesting they came from the  
 244 plasma membrane (Dentler, 2013). Therefore, we hypothesized that due to its role in membrane  
 245 remodeling in other organisms, the Arp2/3 complex may be part of an endocytic pathway that  
 246 provides membrane to cilia (**Figure 3A**). To test if membrane could be coming from an  
 247 endocytic source, we treated cells with BFA to collapse the Golgi and block exocytosis forcing  
 248 cells to utilize other sources of ciliary membrane. Wild-type cilia treated with BFA resorb, but  
 249 *arpc4* mutant cells resorb faster (**Figures 3B and D, S2**), and the number of cells with cilia in  
 250 *arpc4* mutant cells dramatically decreased with BFA treatment (**Figure 3C**). Meanwhile, cells  
 251 treated with other known ciliary resorption-inducing drugs that do not specifically target Golgi  
 252 traffic, 3-isobutyl-1-methylxanthine (IBMX) (Pasquale and Goodenough, 1987) or sodium  
 253 pyrophosphate (NaPPi) (Lefebvre et al., 1978) show an increased velocity of resorption in wild-  
 254 type cells compared to *arpc4* mutant cells (**Figure S5**), so the faster resorption of *arpc4* mutant  
 255 cells in BFA is specific to the effects of BFA. Thus, wild-type cells are more capable of  
 256 maintaining cilia without membrane supply from the Golgi, suggesting there must be another  
 257 source for membrane that is dependent upon the Arp2/3 complex, perhaps the cell body plasma  
 258 membrane.  
 259

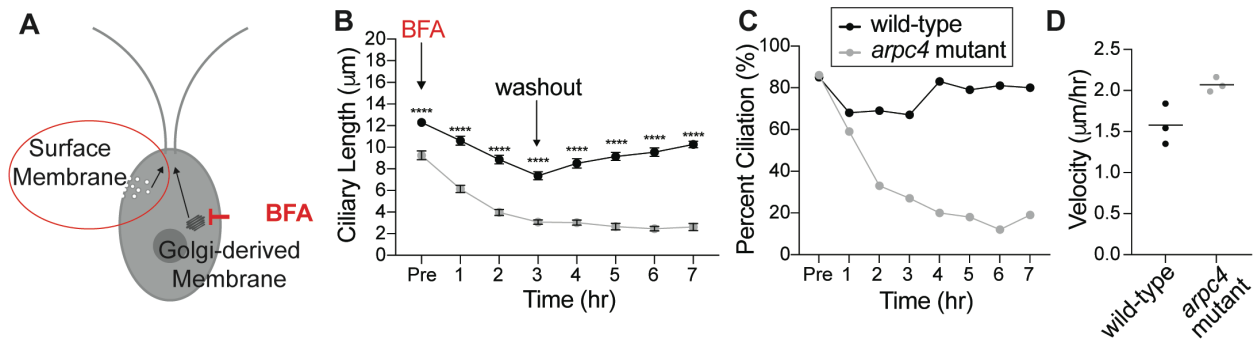

260  
 261 **Figure 3. The Arp2/3 complex is required for ciliary maintenance in the absence of intact Golgi.** **A)** Treating cells  
 262 with Brefeldin A (BFA) causes the Golgi to collapse meaning any membranes and proteins used to maintain the cilia  
 263 must come from other sources. **B)** Cells were treated with 36µM BFA for 3 hours at which time the drug was washed  
 264 out. Wild-type is represented by black, while *arpc4* mutants are grey. The mean is shown with error bars representing  
 265 95% confidence interval. Error bars represent 95% confidence interval of the mean. n=30 for each time point and each  
 266 strain in 3 separate experiments. \*\*\*\* represents P<0.0001. **C)** Percent ciliation of the cells in B. n=100. **D)** Resorption  
 267 speed for wild-type cells and *arpc4* mutant cells as determined by fitting a line to the first 4 time points before washout  
 268 and determining the slope of the line. Line represents the mean of 3 separate experiments. N=3. P=0.0314  
 269

### 270 Ciliary membrane proteins follow different paths from the plasma membrane to the cilia:

271 To determine if ciliary membrane and therefore membrane proteins could be coming  
 272 from a pool in the plasma membrane we did an experiment first described in W. Dentler 2013.  
 273 Surface proteins were biotinylated, then cells were deciliated. After the cilia regrew for 5 hours,  
 274 they were isolated and probed for biotinylated protein (**Figure 4A**). Any biotinylated protein  
 275 present in newly grown and isolated cilia must have come from a pool in the plasma membrane.  
 276 First, we noticed differences in the biotinylated proteins found in wild-type cilia and *arpc4* mutant  
 277 cilia before deciliation, suggesting there are overall differences in the composition of wild-type  
 278 and *arpc4* mutant cilia (**Figure 4C**). If ciliary membrane proteins are coming from the cell body  
 279 plasma membrane in an Arp2/3 complex-dependent manner as we hypothesize, this must be  
 280 the case, as this would mean wild-type and *arpc4* mutant cells have differences in the trafficking



281 pathways that bring ciliary material to cilia. More specifically, there are biotinylated proteins  
 282 present in wild-type cells that are never present in *arpc4* mutant cells, so there is a mechanism  
 283 for delivery of proteins to the cilia from the plasma membrane that absolutely requires the  
 284 Arp2/3 complex (**Figures 4B-C**). There are also some proteins that are present to a higher  
 285 degree in our *arpc4* mutants. We suspect this could be due to compensation by other pathways  
 286 or defects in turnover of proteins in the cilia, perhaps through an exocytic mechanism. Next,  
 287 looking at the cilia post-deciliation. Cilia were harvested 5 hours following deciliation because  
 288 the *arpc4* mutant cilia regrow quite slowly. This means that cells might have time to employ  
 289 other trafficking methods for getting material to cilia, but we still see striking differences. We  
 290 found that while some proteins returned in both wild-type and *arpc4* mutant cells, some  
 291 appeared to a lesser degree in *arpc4* mutant cells compared to wild-type cells (**Figures 8B-E,**  
 292 **black arrow and black bars**) and some returned to a higher degree in *arpc4* mutant cells  
 293 (**Figures 8B-E, grey arrow and grey bars**). This suggests there are multiple paths to the ciliary  
 294 membrane, some of which are Arp2/3 complex-independent and some that are Arp2/3 complex-  
 295 dependent. This may represent lateral diffusion and endocytosis respectively. Importantly, this  
 296 assay tells us that membrane proteins can and do come to the cilia from the cell body plasma  
 297 membrane.  
 298

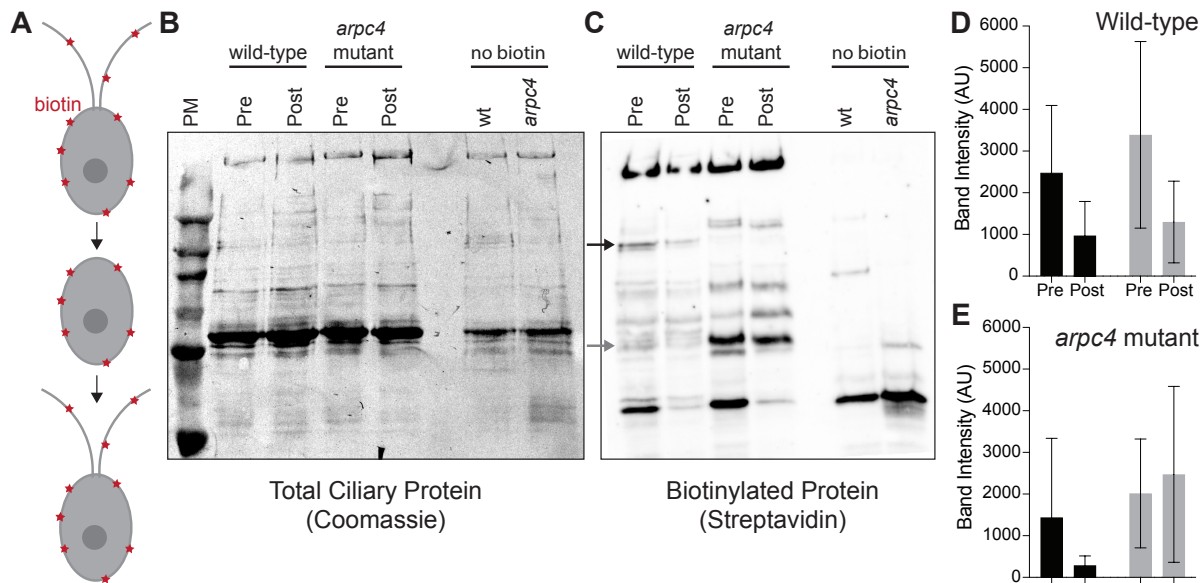

299  
 300 **Figure 4. Ciliary membrane proteins have multiple paths from the plasma membrane. A)** Cells were biotinylated,  
 301 deciliated, and allowed to regrow before cilia were isolated and probed for biotinylated protein. **B)** Total protein in wild-  
 302 type and *arpc4* mutant ciliary isolate investigated by western blot and Coomassie. **C)** Wild-type and *arpc4* mutant cells  
 303 ciliary isolate was investigated by western blot and probed using streptavidin. Black arrow shows ciliary protein present  
 304 to a higher degree in wild-type cells than *arpc4* mutant cells. Grey arrows show ciliary protein that is present to a higher  
 305 degree in *arpc4* mutant cells than in wild-type cells. **D)** Bands represented by black and grey arrows are quantified for  
 306 the wild-type cells. Data acquired from 3 separate experiments. **E)** Bands represented by black and grey arrows are  
 307 quantified for the *arpc4* mutant cells. Data represented as the mean from 3 separate experiments. Error bars represent  
 308 standard deviation.  
 309

310 **The Arp2/3 complex is required for the internalization and relocalization of a membrane**  
 311 **protein from the periphery of the cell to cilia:**

312 Upon finding that ciliary membrane proteins can come from the cell body plasma  
 313 membrane, we next asked if the internalization and relocalization of a known ciliary protein  
 314 could be Arp2/3 complex dependent. SAG1 is a membrane protein important for mating in  
 315 *Chlamydomonas* cells (Belzile et al., 2013; Ranjan et al., 2019). When cells are induced for



316 mating with dibutyryl-cAMP (db-cAMP), SAG1 relocates from the cell periphery to cilia, where  
317 it facilitates ciliary adhesion between mating cells. This relocalization of SAG1 is thought to  
318 occur through internalization and internal trafficking on microtubules (Belzile et al., 2013; Ranjan  
319 et al., 2019).

320 We examined whether actin and the Arp2/3 complex were required for transport of HA-  
321 tagged SAG1 to the cell apex and cilia during mating (**Figure 5A**). We observed cells treated  
322 with either LatB to depolymerize IDA5 or CK-666 to perturb the Arp2/3 complex (**Figures 5, S2**).  
323 Before induction, SAG1-HA localized to the cell periphery (**Figure 5B, top**). 30 minutes after  
324 induction with db-cAMP, SAG1-HA relocalized to the cell apex and to cilia in untreated cells  
325 (**Figure 5B, left**). In both LatB and CK-666 treated cells, this apical enrichment decreased  
326 (**Figure 5B, middle and right**). We took line scans through the cell from the apex to the basal  
327 region (**Figures 5C-D**) and calculated the percentage of cells with apical enrichment. Untreated  
328 cells had a higher percent of apical enrichment when compared with LatB or CK-666 treated  
329 cells (**Figure 5E**). Thus, cells with perturbed Arp2/3 complex or filamentous actin show  
330 decreased efficiency of SAG1-HA relocalization.

331 We asked if this decrease in relocalization in cells with actin and Arp2/3 complex  
332 inhibition could be due to a decrease in internalization of SAG1-HA through a process that  
333 seems to require endocytosis. We used a method first described by Belzile et al. 2013, where  
334 cells were induced and treated with a low percentage (0.01%) of trypsin, which hydrolyzes  
335 exterior proteins but cannot enter the cell. In untreated cells, we see an increase in SAG1-HA  
336 protein levels following induction because SAG1-HA is internalized and becomes protected from  
337 trypsin (**Figure 5F**). In cells treated with either LatB or CK-666 we see a decrease in this trypsin  
338 protection (**Figure 5F**). We quantified this by subtracting the amount of protein before induction  
339 from the amount of protein present after induction, which gives a value representing the amount  
340 of SAG1-HA protected from trypsin due to internalization (**Figure 5G**). The decrease in SAG1-  
341 HA following induction in LatB or CK-666 treated cells indicates a role for Arp2/3 complex and  
342 actin in internalization of this specific ciliary membrane protein.

343

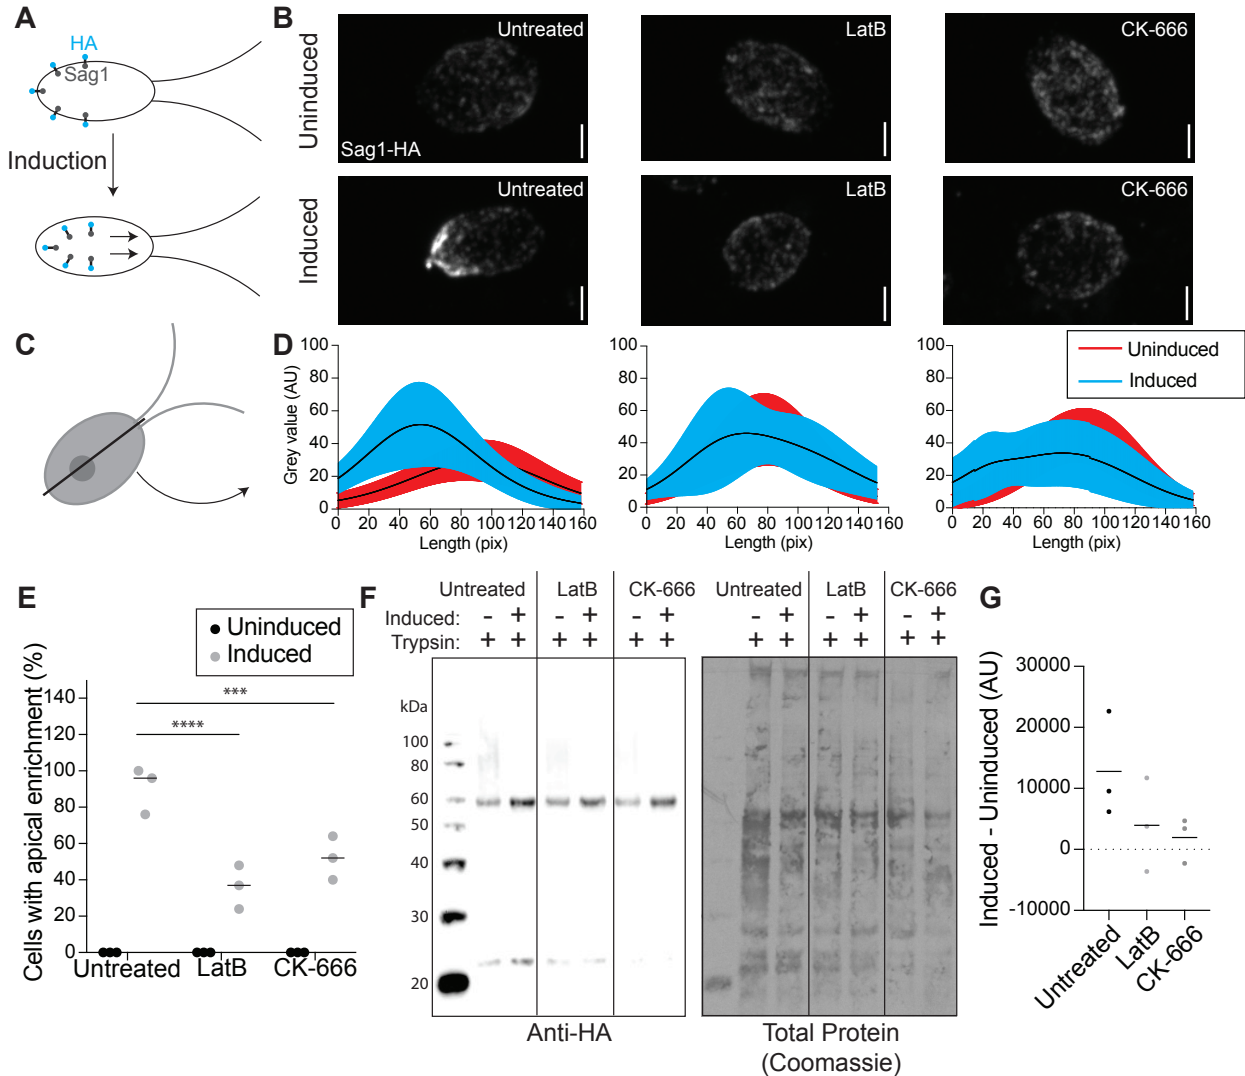

344  
 345 **Figure 5. The Arp2/3 complex is required for the relocalization and internalization of the ciliary protein SAG1**  
 346 **for mating.** **A)** When mating is induced SAG1-HA is internalized and relocalized to the apex of the cells and cilia for  
 347 agglutination. **B)** Maximum intensity projections of z-stacks showing SAG1-HA. Scale bar represents 2 μm. **C)** Line  
 348 scans were taken through the cells in z-stack sum images. **D)** Line scans in untreated cells (left), LatB treated cells  
 349 (middle), and CK-666 (right) were normalized and fit with a gaussian curve. The curves were averaged. Black lines  
 350 represent mean and shaded regions represent standard deviation. Red represents uninduced samples, cyan  
 351 represents induced samples. 0 on the y-axis represents the apical region of the cell. n=30 from a single representative  
 352 experiment. **E)** Percentage of cells with apical enrichment for uninduced (black) and induced (grey) cells for each  
 353 treatment group. The mean is shown with the solid line. N=30 for 3 separate experiments for each treatment. **F)** Western  
 354 blot showing amount of SAG1-HA in uninduced and induced cells in each treatment group all treated with 0.01% trypsin.  
 355 **G)** Intensity of the bands in F were normalized to the total protein as determined by Coomassie staining and quantified  
 356 in ImageJ was used to subtract uninduced from induced to give a representation of the amount of SAG1-HA internalized  
 357 with induction. Line represents mean of 3 separate experiments.

358  
 359 **Apical actin dots are dependent on the Arp2/3 complex:**

360 Since ciliary membrane proteins can come from the Golgi or the plasma membrane and  
 361 *arpc4* mutant cells have a more severe defect in incorporating ciliary proteins from non-Golgi  
 362 sources, we asked if Arp2/3 complex-mediated actin networks might be responsible for plasma  
 363 membrane remodeling in *Chlamydomonas* as it is in other organisms. Thus, we looked at the  
 364 effects of loss of Arp2/3 complex function on actin structures. Using new protocols for  
 365 visualizing actin in *Chlamydomonas* (Craig et al., 2019), we stained wild-type cells and *arpc4*

366 mutant cells with fluorescent phalloidin. In wild-type cells, apical dots reminiscent of endocytic  
367 actin patches in yeast are seen near the base of cilia (Figure 6A). We quantified the presence  
368 of dots in the wild-type cells compared to *arpc4* mutant cells (Figure 6A-B). While about 70% of  
369 wild-type cells contain the dots, less than 5% of *arpc4* mutant cells had dots (Figure 6B),  
370 suggesting the Arp2/3 complex is required for formation of this structure. Expression of the  
371 ARPC4-V5 construct in *arpc4* mutant cells rescued the dots (Figure 6C). Because ARPC4-V5  
372 staining showed diffuse signal throughout the cell, we are not able to determine whether or not  
373 active Arp2/3 complex localizes to the dots (Figure S1C). However, the reliance of this structure  
374 on the Arp2/3 complex suggests that the Arp2/3 complex is definitely involved in this structure.  
375 This led us to question whether these dots could represent membrane remodeling.  
376

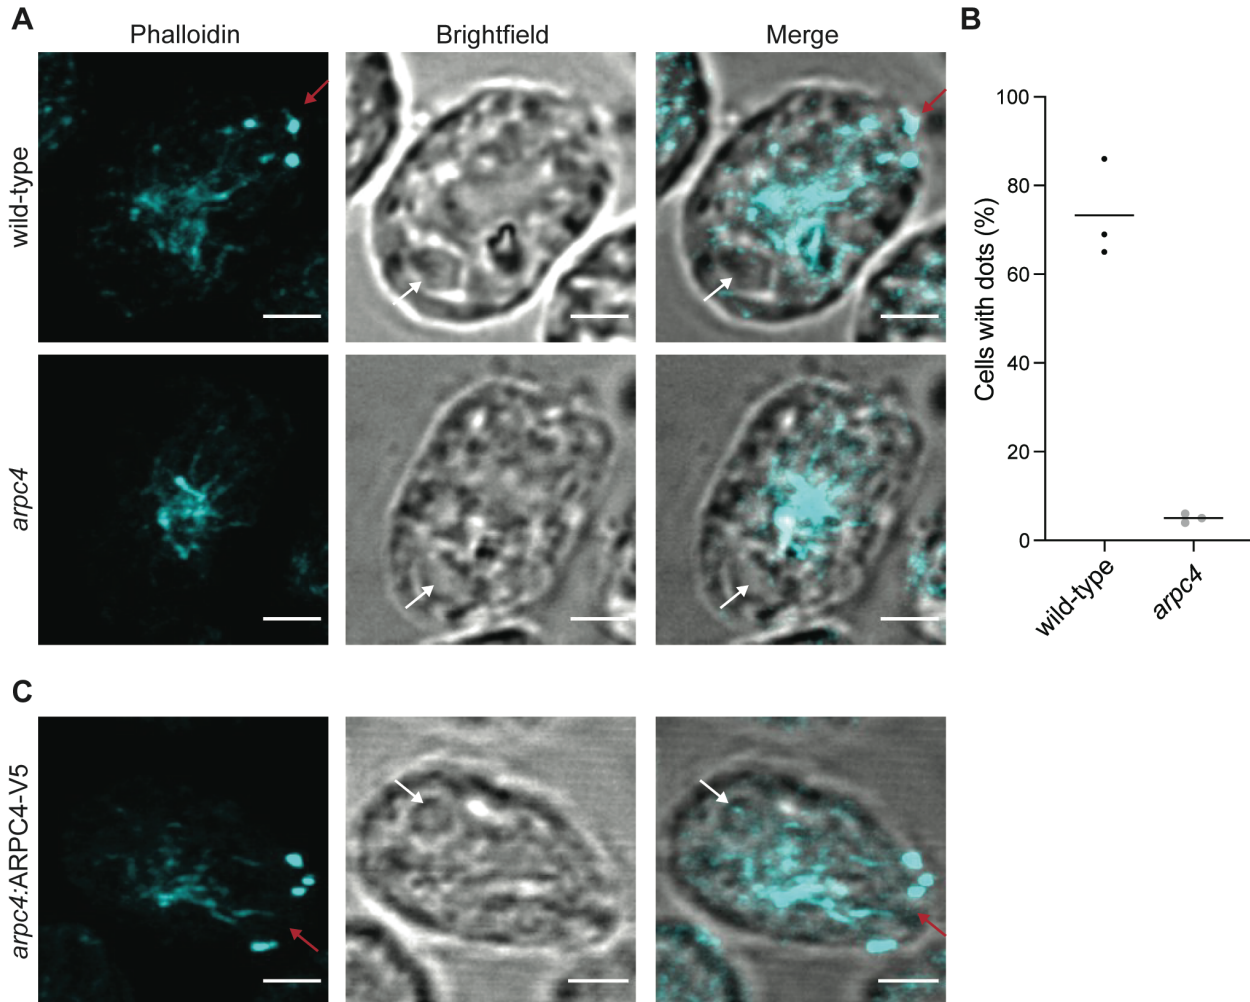

377  
378 **Figure 6. Loss of a functional Arp2/3 complex results in changes in actin distribution. A)** Wild-type and *arpc4*  
379 mutant cells stained with phalloidin to visualize the actin network along with brightfield to show cell orientation. Images  
380 were taken as a z-stack using airsycan imaging and are shown as a maximum intensity projection. Red arrow is pointing  
381 to dots at the apex of the cell, and white arrow is pointing to the pyrenoid near the basal end of the cell. Scale bars  
382 represent 2 $\mu$ m. **B)** Percentage of cells with apical dots as shown in A. Percentages taken from 3 separate experiments  
383 where n=100. Line represents the mean. P<0.0001. **C)** Presence of apical dots in the *arpc4* mutant rescue expressing  
384 ARPC4-V5. Images were taken as a z-stack using airsycan imaging and are shown as a maximum intensity projection.  
385 Red arrow is pointing to dots at the apex of the cell, and white arrow is pointing to the pyrenoid near the basal end of  
386 the cell. Scale bars represent 2 $\mu$ m.

387  
388  
389

390 **Endocytosis occurs in *Chlamydomonas*:**

391 The Arp2/3 complex is thought to be involved in endocytosis in cell-walled yeast to  
392 overcome turgor pressure (Aghamohammadzadeh and Ayscough, 2009; Basu et al., 2014;  
393 Carlsson and Bayly, 2014). *Chlamydomonas* cells also have a cell wall and since the actin dots  
394 resemble yeast endocytic pits (Adams and Pringle, 1984; Ayscough et al., 1997; Goode et al.,  
395 2015), we hypothesized that Arp2/3 complex-dependent endocytosis might be occurring in  
396 *Chlamydomonas* though this process has not yet been directly demonstrated in this organism.  
397 To determine what kind of endocytosis likely occurs in these cells, we compared the  
398 endocytosis-related proteins found in mammals and plants to those in *Chlamydomonas* (**Figure**  
399 **7A**). *Chlamydomonas* lacks much of the important machinery for almost all typical endocytosis  
400 processes, including caveolin for caveolin-mediated endocytosis, flotillin for flotillin-dependent  
401 endocytosis, and endophilin for endophilin-dependent endocytosis (**Figure 7A**). However,  
402 clathrin-mediated endocytosis is conserved to a higher extent than other endocytic  
403 mechanisms.

404 We aimed to probe the likelihood of endocytosis occurring in *Chlamydomonas*, but a  
405 mutant for the proteins involved in clathrin-mediated endocytosis does not currently exist and  
406 methods of targeted mutagenesis in *Chlamydomonas* are not yet reliable. So, we turned to our  
407 best alternative PitStop2, which inhibits the interaction of adaptor proteins with clathrin, halting  
408 clathrin endocytosis, despite reported off-target effects on global endocytosis in mammalian  
409 cells (Wilcox et al., 2014) (**Figure S2**). We also used the dynamin inhibitor Dynasore, which is  
410 thought to block endocytosis by inhibiting the GTPase activity of dynamin (Macia et al., 2006),  
411 although this inhibitor has also been found to affect actin in some mammalian cells (Mooren  
412 Olivia L. and Schafer Dorothy A., 2009; Park et al., 2013; Yamada et al., 2009). Although both  
413 PitStop2 and Dynasore are reported to have off-target effects in different pathways, their  
414 intended target is in the same pathway. Therefore, by using both we hope to reduce concerns of  
415 off-target effects. To further minimize off-target effects, this experiment was done in a fast time  
416 scale and at the lowest concentration possible. For this experiment, we used the fixable  
417 lipophilic dye FM 4-64FX (Cochilla et al., 1999; Gachet and Hyams, 2005), which is  
418 impermeable to the plasma membrane but is endocytosed into cells showing bright foci where  
419 dye is enriched in endocytic compartments. We incubated the dye for 1 minute to allow enough  
420 time for internalization into endosomes but not enough for incorporation into various cellular  
421 membrane structures. The ability of cells to internalize membrane was measured by calculating  
422 the total cell fluorescence inside the cell after dye internalization (**Figure 7B**). Cells treated with  
423 PitStop2 or Dynasore internalized significantly less membrane dye (**Figure 7C**), which supports  
424 the idea that endocytosis is occurring in these cells and that it is likely clathrin-mediated.

425 Next, we tested whether endocytosis is Arp2/3 complex-dependent by using this  
426 membrane internalization assay on *arpc4* mutant cells compared to wild-type cells and CK-666  
427 treated cells compared to CK-689 treated cells. *arpc4* mutant cells and cells treated with CK-  
428 666 have decreased total cell fluorescence (**Figure 7D-F**) suggesting endocytosis in  
429 *Chlamydomonas* is Arp2/3 complex-dependent.



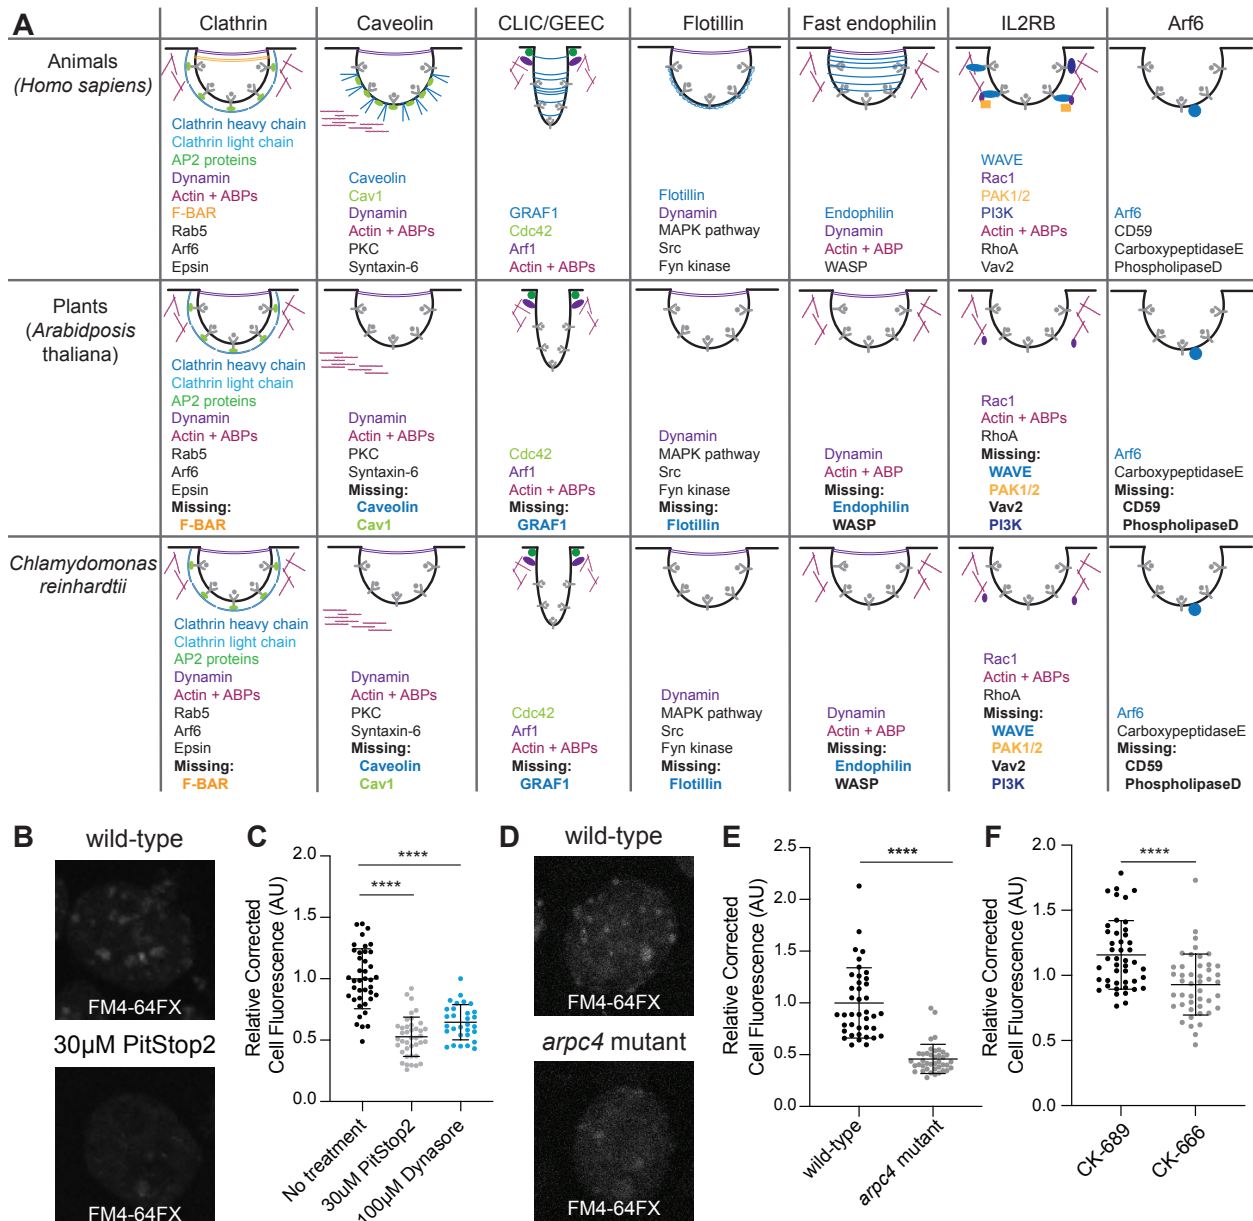

430  
 431 **Figure 7. Arp2/3 complex-dependent endocytosis is conserved in *Chlamydomonas*.** **A)** Gene presence was  
 432 determined using BLAST. Word colors correspond to diagram colors. **B)** Cells treated with 30µM PitStop2 were  
 433 incubated with FM4-64FX and imaged on a spinning disk confocal. Max intensity projections of z-stacks are shown.  
 434 Scale bars are 2µm. **C)** The background corrected fluorescence for each sample, including cells treated with 100µM  
 435 Dynasore. The mean is shown with error bars showing standard deviation. n=30 in 3 separate experiments. P<0.0001.  
 436 **D)** Wild-type and *arpc4* mutant cells treated with FM4-64FX and imaged on a spinning disk confocal. Max intensity  
 437 projections of z-stacks are shown. Scale bars are 2µm. **E)** The background corrected fluorescence for each sample.  
 438 The mean is shown with error bars representing standard deviation. n=30 in 3 separate experiments. P<0.0001. **F)** The  
 439 background corrected fluorescence for cells treated with CK-666 or CK-689. The mean is shown with error bars  
 440 representing standard deviation. n=30 in 3 separate experiments. P<0.0001.

441

442

#### 443 Actin dots increase in an Arp2/3 complex and endocytosis-dependent manner following 444 deciliation:

445 Having established that the Arp2/3 complex is required for ciliary assembly, membrane  
 446 dye internalization, and endocytosis of a known ciliary protein, we wondered if these functions

447 could be connected given that *arpc4* mutant cells have defects in maintaining cilia from non-  
448 Golgi sources. We returned to the Arp2/3 complex-dependent actin dots that are reminiscent of  
449 endocytic pits in yeast. Because ciliary membrane and proteins can come from the plasma  
450 membrane (Dentler, 2013), we suspected there would be an increase in actin dots following  
451 deciliation. We used phalloidin to visualize the actin cytoskeleton of wild-type cells before and  
452 immediately following deciliation, as well as 10 minutes later (**Figure 8A**). We saw an increase  
453 in both the percentage of cells with dots and the number of dots per cell immediately following  
454 deciliation that returned to normal by 10 minutes (**Figures 8A, D**). This is consistent with the  
455 results in **Figures 1E-F** and confirms that the defect in ciliary assembly is due to an event  
456 occurring very early in ciliary assembly, within the first few minutes after deciliation.

457 In the *arpc4* mutant cells dots were never observed, before or after deciliation (**Figure**  
458 **8B, D**), confirming these dots are Arp2/3 complex dependent. Next, we investigated if the dots  
459 were due to endocytosis by treating cells with PitStop2 and looking for this same increase in  
460 dots. This treatment almost fully blocked the appearance of dots following deciliation and  
461 eliminated the presence of cells with 3 or more dots (**Figure 8C-D**), suggesting an Arp2/3  
462 complex-dependent endocytic mechanism is related to these dots that occur immediately  
463 following endocytosis when ciliary material is in high demand.

464



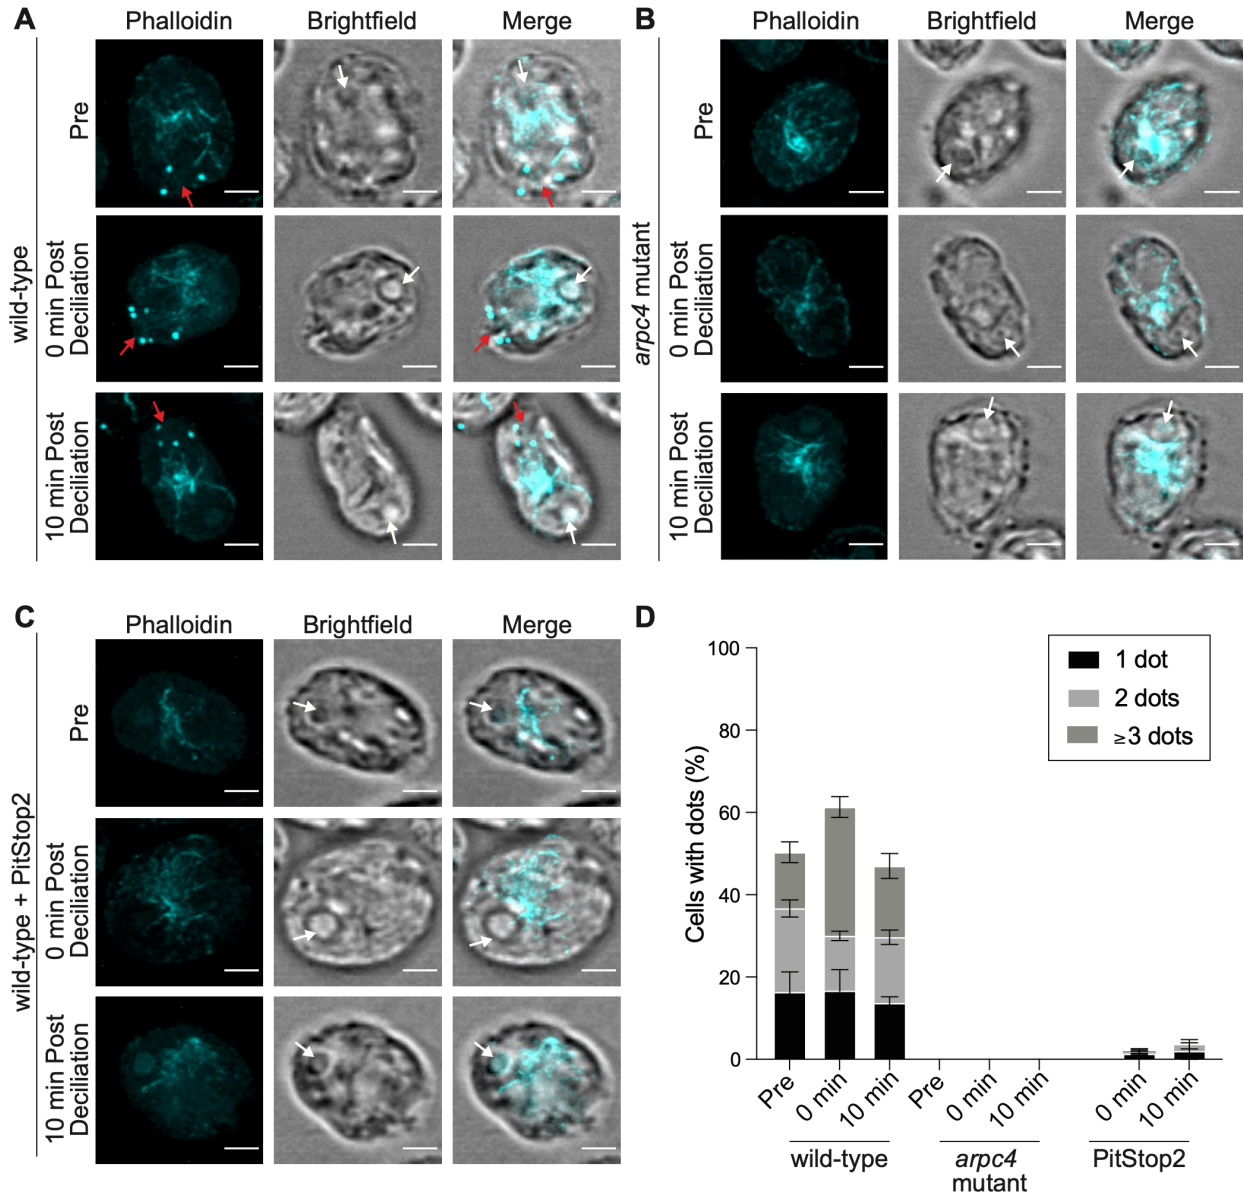

465  
 466 **Figure 8. Actin dots require the Arp2/3 complex and endocytosis. A-C** Wild-type cells (A), *arpc4* mutant cells (B),  
 467 and wild-type cells treated with 30  $\mu$ M PitStop2 (C) stained with phalloidin to visualize the actin network before  
 468 deciliation, immediately following deciliation, and 10 minutes following deciliation. Brightfield images are to visualize  
 469 cell orientation. Images were taken as a z-stack and are shown as a maximum intensity projections. Scale bar  
 470 represents 2 $\mu$ m. Red arrows point to dots at the apex of the cell, and white arrows point to the pyrenoid at the opposite  
 471 end of the cell. **D**) The percentage of cells with 1 dot, 2 dot, or 3 dots in each condition. Quantification based on sum  
 472 slices of z-stacks taken using a spinning disk confocal. n=100 in 3 separate experiments. For wild-type, the total number  
 473 of cells with dots is significantly different for the 0 min time point (\*\*\*) and the number of dotted cells with 3 or more dots  
 474 is significantly different for the 0 time point (\*\*\*\*).  
 475  
 476

## 477 DISCUSSION

478 In this study, we investigate the Arp2/3 complex of *Chlamydomonas reinhardtii* that  
 479 functions to maintain and assemble cilia. This complex potentially lacks the ARPC5 subunit,  
 480 although it is possible that a divergent ARPC5 exists. In yeast, deletion of any of the genes  
 481 encoding Arp2/3 complex members causes severe defects, but these defects differ in severity

482 depending on the complex members deleted, suggesting complex members have varying  
483 degrees of importance in Arp2/3 complex function (Winter et al., 1999). The role of ARPC5 in  
484 actin nucleation is being investigated, but some groups have found it unnecessary for function  
485 of the complex (Gournier et al., 2001; von Loeffelholz et al., 2020). Furthermore, our data show  
486 that knocking out function of the ARPC5-less *Chlamydomonas* Arp2/3 complex results in  
487 various phenotypes, suggesting the wild-type complex is active. In this paper, we study the  
488 Arp2/3 complex using 2 main perturbations: genetic inhibition of the ARPC4 member of the  
489 complex and chemical inhibition with the inhibitor CK-666. CK-666 is designed for mammalian  
490 cells, but we believe that CK-666 is functional in *Chlamydomonas* because it can recapitulate  
491 the effects of the genetic mutant. Regardless, we used both the genetic perturbation and the  
492 chemical perturbation for nearly every experiment looking at the role of the Arp2/3 complex in  
493 these phenotypes. Additionally, if we treat the *arpc4* mutant with CK-666 we do not see these  
494 same phenotypes, again suggesting that CK-666 is acting to block the same functions as the  
495 genetic *arpc4* mutant (**Figure 1A**). Because the Arp2/3 complex has known functions in  
496 membrane dynamics and because of our data demonstrate a role for the Arp2/3 complex of  
497 *Chlamydomonas* in membrane and membrane protein internalization, this led us to pursue  
498 models of Arp2/3 complex-dependent membrane trafficking to cilia.

499 Previously, three models of membrane protein trafficking to cilia have been proposed  
500 regarding where ciliary vesicles fuse relative to a diffusion barrier composed of septins (Hu  
501 Qicong et al., 2010), which delineates ciliary membrane and cell body plasma membrane  
502 (Nachury et al., 2010). The first is that Golgi vesicles containing ciliary proteins fuse with the  
503 ciliary membrane inside the cilium. Proteins, both membrane and soluble, have been found to  
504 travel from the Golgi to the cilia on or in cytoplasmic vesicles (Wood and Rosenbaum, 2014).  
505 Second, Golgi vesicles containing ciliary proteins fuse outside but near the cilium still within the  
506 diffusion barrier (Nachury et al., 2007; Papermaster et al., 1985; Zuo et al., 2009). In  
507 *Chlamydomonas*, mastigoneme proteins travel from the Golgi and are exocytosed for use on  
508 the exterior of the cell (Bouck, 1971). In the third model, Golgi vesicles containing proteins fuse  
509 with the plasma membrane outside the diffusion barrier where they move in the plane of the  
510 plasma membrane across this barrier, perhaps through lateral diffusion that requires remodeling  
511 or passing through the diffusion barrier. Evidence for this path was shown using Hedgehog  
512 signaling protein Smoothed, which relocalizes in a dynamin-independent manner from the  
513 plasma membrane to the cilia immediately after stimulation in pulse labeling studies (Milenkovic  
514 et al., 2009).

515 Our data all together support a fourth model, likely occurring in concert with other  
516 models, in which membrane and membrane proteins are recruited to the cilium from a reservoir  
517 in the cell body plasma membrane. We show that the Arp2/3 complex is required for ciliary  
518 assembly from zero-length (**Figure 1**); we show that ciliary membrane proteins can and do  
519 come from the cell body plasma membrane, both generally (**Figure 4**) and for a specific protein  
520 (**Figure 5**); we show that the Arp2/3 complex is required for endocytosis (**Figure 7**) and for the  
521 formation of actin dots reminiscent of endocytic pits or patches (**Figures 6, 8**); and finally we  
522 show an endocytosis-dependent increase in Arp2/3 complex-mediated actin dots immediately  
523 following deciliation (**Figure 8**). Thus, we hypothesize that ciliary membrane proteins and  
524 membrane targeted to the plasma membrane of the cell outside the diffusion barrier can be  
525 endocytosed and trafficked to cilia, either within or outside of the diffusion barrier in an actin and  
526 Arp2/3 complex-dependent manner.

527 Although our data do not eliminate the possibility of Arp2/3 complex function in supply of  
528 ciliary membrane and protein stored in other endosomal compartments, ciliary localization of  
529 proteins initially labeled on the cell surface with biotin (**Figure 8**) suggests some ciliary  
530 membrane proteins incorporated during assembly are coming from the plasma membrane itself.  
531 One limitation to this study is the time frame. We isolated cilia following 5 hours of regrowth to  
532 get a measurable amount of *arpc4* mutant cilia, which have very defective growth. This means

533 that compensatory mechanisms such as synthesis and slower trafficking may be involved. We  
534 also cannot rule out an additional role for the Arp2/3 complex in delivery of existing soluble  
535 proteins to cilia. An in-depth analysis of soluble protein recruitment and incorporation would be a  
536 useful next step to determine if the Arp2/3 complex is involved in other ciliary assembly related  
537 processes. Our data also does not preclude Arp2/3 complex function in other membrane  
538 dynamics. However, all the data in this paper together support a model involving membrane  
539 remodeling and endocytosis. An endocytic mechanism of trafficking in intracellular ciliogenesis  
540 has been investigated in mammalian RPE1 cells. The ciliary pocket found at the base of primary  
541 and motile cilia formed intracellularly has been found to be an endocytically active region (Molla-  
542 Herman et al., 2010) but clathrin-mediated endocytosis was not required for ciliogenesis in  
543 those cells. The Bardet Biedl Syndrome complex (BBsome), which is involved in regulation of  
544 ciliary membrane protein composition, has been shown to interact with clathrin directly at the  
545 ciliary pocket to facilitate membrane sorting in trypanosomes (Langousis et al., 2016). Further,  
546 some BBsome complex members resemble coat proteins such as clathrin (Jin et al., 2010)  
547 suggesting a direct role for the this cilium regulatory complex in membrane functions. It has also  
548 been found that disruption of recycling endosomes reduces the localization of polycystin-2 to  
549 cilia, suggesting a role for recycling endosomes in the localization of proteins to the cilia (Monis  
550 et al., 2017). In *Chlamydomonas*, clathrin heavy chain has been found to localize at the base of  
551 cilia (Kaplan et al., 2012). While the mechanism was unknown, it has been shown that plasma  
552 membrane surface-exposed proteins are relocalized to cilia during ciliary regeneration (Dentler,  
553 2013), a result we recapitulated and demonstrated depends, in part, upon the Arp2/3 complex.

554 Altogether, this leads us to hypothesize that the role of the Arp2/3 complex in ciliary  
555 assembly is through endocytic recruitment from a ciliary protein reservoir in the plasma  
556 membrane before newly synthesized protein and Golgi-derived membrane can supply additional  
557 materials (**Figure 9B**). While this model provides a possible route that some ciliary proteins and  
558 membranes take to the cilia, we believe this is one of several paths that can be taken to the  
559 cilia. This could be further investigated by determining specific proteins that may take these  
560 different paths to the cilia. Trafficking to cilia is likely cargo- and time-dependent, and which path  
561 proteins take may tell us the order and speed in which they populate the cilium for subsequent  
562 function.

563

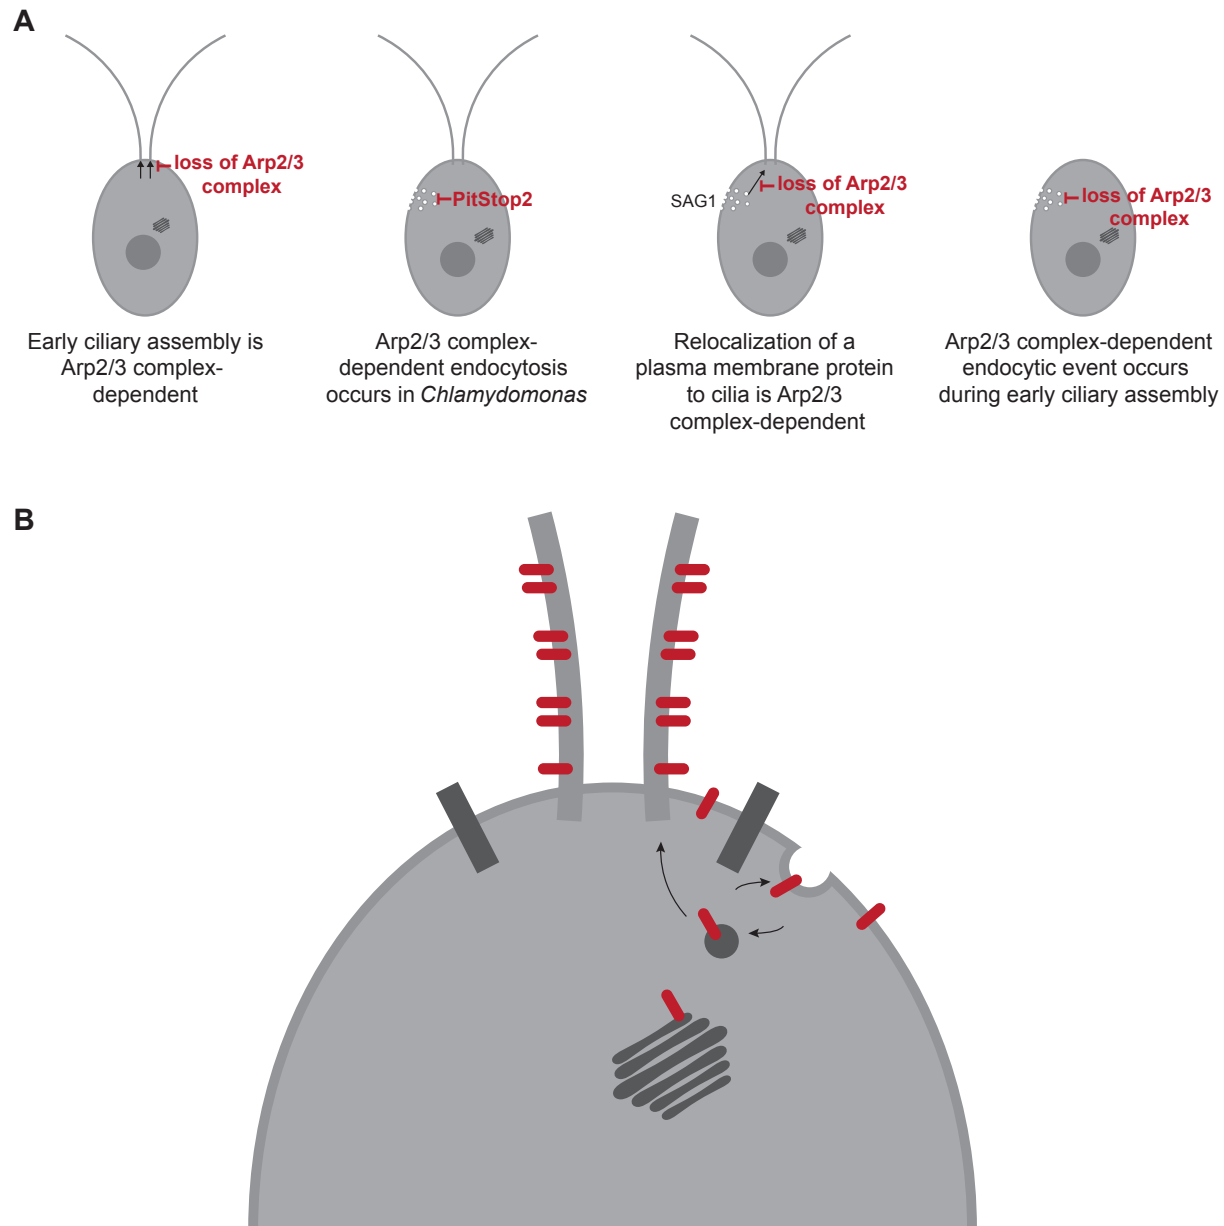

564  
565  
566  
567  
568  
569  
570  
571

**Figure 9. The Arp2/3 complex is required for membrane and protein delivery via a Golgi-independent, endocytosis-like process. A)** Arp2/3-mediated actin networks are required for ciliary assembly in *Chlamydomonas* particularly during the initial stages. These actin networks are also required for endocytosis, and for the endocytosis-like relocalization of a ciliary protein from the plasma membrane to the cilia. Finally, a large endocytic event occurs immediately following deciliation that is Arp2/3 complex-mediated. **B)** Proposed model of membrane protein and membrane transport from the plasma membrane to the cilia through endocytosis.

## 572 METHODS

### 573 Strains:

574 The wild-type *Chlamydomonas* strain (CC-5325) and the *arpc4* mutant (LMJ.RY0402.232713)  
575 are from the *Chlamydomonas* resource center. The *arpc4:ARPC4-V5* strain was made by  
576 cloning the gene into pChlamy4 (*Chlamydomonas* resource center). Colonies were screened for  
577 the absence (in the case of the mutant) or presence (in the case of the rescue) by PCR using  
578 the primers AAAAGAATTCATGGCGCTCTCACTCAGGCCATA and



579 AAAATCTAGACAGAAGGCAAGGGAGCGCAGGAA. The SAG1-HA strain was a gift from  
580 William Snell. Cells were grown and maintained on 1.5% Tris-Acetate Phosphate Agar (TAP)  
581 plates (*Chlamydomonas* resource center) under constant blue (450-475 nm) and red light (625-  
582 660 nm). For experiments, cells were grown in liquid TAP media (*Chlamydomonas* resource  
583 center) overnight under constant red and blue light with agitation from a rotator. To induce  
584 gametes for mating for the SAG1-HA experiments, cells were grown in liquid M-N media  
585 (*Chlamydomonas* resource center) overnight with constant red and blue light and agitation.  
586

#### 587 *Ciliary studies:*

588 For steady state experiments, cells were treated with specified drugs [either 100 $\mu$ M CK-666,  
589 250 $\mu$ M CK-666 (Sigma, 182515) 250 $\mu$ M CK-689 (CalBiochem, 182517), 10 $\mu$ M LatB (Sigma,  
590 L5288), 10 $\mu$ M CHX (Sigma, C1988), or 36 $\mu$ M BFA (Sigma, B7651) all diluted in DMSO (Sigma,  
591 D2650)] and incubated with agitation for the allotted times. Following any incubation (as well as  
592 a pre sample), cells were diluted in an equal volume of 2% glutaraldehyde (EMS, 16220) and  
593 incubated at 4° Celsius until they sediment (within 24hrs). Following sedimentation, cells were  
594 imaged using a Zeiss Axioscope 5 DIC microscope with a 40X objective (0.75 numerical  
595 aperture) at room temperature with no immersion media or imaging media. Images were  
596 acquired using Zeiss Zen 3.1 (blue edition). Cilia were then measured using the segmented line  
597 function in ImageJ. One cilium per cell was measured and 30 cilia total were measured.  
598

599 For regeneration experiments, a pre sample was taken by adding cells to an equal volume of  
600 2% glutaraldehyde. Then cells were deciliated with 115 $\mu$ L of 0.5N acetic acid for 45 seconds.  
601 After this short incubation, the pH was returned to normal by adding 120 $\mu$ L of 0.5N KOH. A 0-  
602 minute sample was again taken by adding cells to an equal volume of 2% glutaraldehyde. Then  
603 cells were incubated with agitation and allowed to regrow cilia for the allotted time period with  
604 samples taken at the indicated time points by adding cells to an equal volume of 2%  
605 glutaraldehyde. Cells in glutaraldehyde were allowed to incubate at 4° Celsius until  
606 sedimentation (within 24hrs). Then, cells were imaged using the same Zeiss DIC microscope  
607 with a 40X objective and the same software. Cilia were then measured using the segmented  
608 line function in ImageJ. One cilium per cell was measured and 30 cilia total were measured.  
609

#### 610 *ARPC4 Rescue:*

611 The ARPC4 genetic sequence was isolated from *Chlamydomonas* cDNA using PCR with the  
612 Q5 DNA Polymerase (NEB, M0491L). The resulting fragment and the pChlamy4 plasmid  
613 (ThermoFisher, A24231) were digested with EcoRI (NEB, R0101S) and XhoI (NEB, R0146S) for  
614 1 hour followed by heat inactivation. Then, the fragment and vector were mixed in a 5:1 ratio  
615 and ligated with T4 DNA Ligase (NEB, M0202L) overnight at 16°C. The vector was then  
616 transformed into One Shot TOP10 chemically competent cells (Invitrogen, C404003) following  
617 the product protocol. The transformed competent cells were plated on LB plates with 100  $\mu$ g/mL  
618 ampicillin (IBI Scientific, IB02040) and grown overnight at 37°C. The following morning colonies  
619 were screened using DreamTaq DNA Polymerase (Thermo, EP0702) and the forward primer  
620 AAAAGAATTCATGGCGCTCTCACTCAGGCCATA and the reverse primer  
621 AAAATCTAGACAGAAGGCAAGGGAGCGCAGGAA. Positive colonies were grown in liquid LB  
622 with 100  $\mu$ g/mL ampicillin overnight at 37°C. Plasmid DNA was isolated from bacterial cells and  
623 sequenced.  
624

625 Plasmids containing the ARPC4 DNA were then transformed into *Chlamydomonas* cells. First, a  
626 5 mL liquid culture of *arpc4* mutant cells was grown overnight with agitation and constant light in  
627 TAP. The following day 25 mL of TAP was brought to an OD<sub>730</sub> of 0.1 using the 5 mL culture.  
628 This was incubated with agitation and under constant light overnight. The culture reached an

629 OD<sub>730</sub> of 0.3-0.4 for the transformation. Once this occurred, the plasmid was linearized using  
630 Scal (NEB, R3122L). Meanwhile, the 25 mL culture was centrifuged at 500xg to pellet the cells.  
631 The TAP was removed and replaced with 5 mL of Max Efficiency Transformation Reagent for  
632 Algae (Invitrogen, 100021485). This was repeated 2 times. After the final centrifugation, the  
633 cells were resuspended in 250 µL of Max Efficiency Transformation Reagent. This was then  
634 split in two. 1000 µg of linearized plasmid was added to each. This was then electroporated  
635 using a BioRad Electroporator at 500V, 50 µF, and 800 Ω in a 4 mm cuvette. The cells were  
636 removed from the cuvette following electroporation, suspended in 7 mL of TAP + 40 mM  
637 sucrose, and incubated overnight in the dark. The following day the cells were pelleted and  
638 streaked on TAP + Zeocin (10 µg/mL) plates, then incubated in constant light for approximately  
639 1 week or until colonies formed.

640  
641 Colonies were screened using DreamTaq DNA Polymerase (Thermo, EP0702) and the same  
642 primers as above. Positive colonies were streaked onto new plates and allowed to grow up.  
643 Expression of ARPC4-V5 was confirmed with a western blot. Liquid cultures of cells were grown  
644 overnight, then pelleted at 500 xg for 1 minute. Cells were resuspended in lysis buffer [5%  
645 glycerol (), 1% NP-40 (), 1mM DTT (), 1X protease inhibitors (Thermo, 1861281)] and lysed  
646 using bead beating. Cell debris was spun down at 14000xg for 15 minutes. An equal amount of  
647 protein was loaded to a NuPAGE 10% Bis-Tris gel (Invitrogen, NP0316). The resulting gel was  
648 transferred to PVDF membrane (Millipore, IPVH00010) which was then blocked with 5% milk in  
649 PBST. The blot was incubated with rabbit anti-V5 primary antibody (Cell Signaling, D3H8Q)  
650 diluted to 1:1000 in 1% BSA, 1% milk overnight at 4°C to probe for V5. The following day blots  
651 were washed 3 times in 1X PBST, then incubated with HRP-conjugated goat anti-rabbit  
652 secondary (Thermo, G-21234) diluted to 1:5000 in 1% milk 1% BSA for 1 hour at room  
653 temperature. The blot was washed again 3 times with 1X PBST. Then the blot was probed with  
654 West Pico Chemiluminescent Pico Substrate (Invitrogen, 34580). The same membrane was  
655 stripped of antibody and total protein was determined with Coomassie (Sigma, B0149) staining.  
656 Band intensity was measured in ImageJ and normalized to total protein.

657  
658 *Click-iT OPP Protein Synthesis Assay (Invitrogen, C10457):*

659 Cells were grown overnight in TAP. The following day cells were deciliated as described above  
660 and allowed to regrow either with or without cycloheximide (10µM) to block protein synthesis. 1  
661 hour following deciliation, cells were mounted onto poly-lysine (EMS, 19321-B) coverslips. Cells  
662 on coverslips were incubated with Click-iT OPP reagent containing the O-propargyl-puromycin  
663 (OPP) which is incorporated into nascent polypeptides for 30 minutes. OPP was removed and  
664 cells were washed once in PBS. Cells were then fixed with 4% PFA (EMS, 15710) in 1X HEPES  
665 (Sigma, 391338) for 15 minutes, then permeabilized with 0.5% Triton-X 100 in PBS for 15  
666 minutes. Cells were washed twice with PBS. Detection was performed by incubating coverslips  
667 with 1X Click-iT OPP Reaction Cocktail that includes 1X Click-iT OPP Reaction Buffer, 1X  
668 Copper Protectant, 1X Alexafluor picolyl azide, and 1X Click-iT Reaction Buffer Additive for 30  
669 minutes protected from light. This was removed and Reaction Rinse Buffer was added for 5  
670 minutes. This was removed and coverslips were washed twice with PBS, allowed to dry fully,  
671 and mounted with Fluormount-G (Invitrogen, 00-4958-02).

672  
673 Cells were then imaged on a Nikon Eclipse Ti-E microscope with a Yokogawa, two-camera,  
674 CSU0W1 spinning disk system with a Nikon LU-N4 laser launch at room temperature with a  
675 100X oil-immersion objective (1.45 numerical aperture). Images were acquired using Nikon  
676 Elements and analyzed using ImageJ as follows. Z-stacks were obtained then combined into  
677 sum slices for quantification of maximum intensity projections for viewing. In the summed  
678 images, the integrated density and area of individual cells was obtained, as well as the



679 background fluorescence. These were then used to calculate CTCF, which was then normalized  
680 to the “Pre” sample for each cell.

681

682 *Phalloidin staining and quantification:*

683 Procedure adapted from (Craig et al., 2019). Cells were mounted onto poly-lysine coverslips  
684 and fixed with fresh 4% paraformaldehyde in 1X HEPES. Coverslips with cells were then  
685 permeabilized with acetone and allowed to dry. Cells were rehydrated with PBS, stained with  
686 Phalloidin-Atto 488 (Sigma, 49409-10NMOL), and finally washed with PBS and allowed to dry  
687 before mounting with Fluormount-G (Craig et al., 2019). Cells were imaged using the Nikon  
688 Spinning Disk Confocal discussed above. Z-stacks were obtained in Nikon Elements, and in  
689 ImageJ, maximum intensity projections were created for viewing. Publication quality images  
690 were acquired using a Zeiss LSM880 with Airyscan with two photomultiplier tubes, a GaAsP  
691 detector, and a transmitted light detector. Images were taken at room temperature using a 100x  
692 (1.46 numerical aperture) oil-immersion lens. Images were acquired using Zeiss Zen (black  
693 edition) and prepared for publication using ImageJ.

694

695 *Electron microscopy:*

696 Cells (1mL of each strain) were deciliated via pH shock by adding 115 $\mu$ L of 0.5N acetic acid for  
697 45 seconds followed by 120 $\mu$ L of 0.5N KOH to bring cells back to neutral pH. Cells were  
698 allowed to regrow cilia for 30 minutes. A pre sample and a 30-minute post-deciliation sample  
699 were fixed in an equal volume of 2% glutaraldehyde for 20 minutes at room temperature.  
700 Samples were then pelleted using gentle centrifugation for 10 minutes. The supernatant was  
701 removed, and cells were resuspended in 1% glutaraldehyde, 20mM sodium cacodylate. Cells  
702 were incubated for 1 hour at room temperature and then overnight at 4° Celsius. This protocol  
703 was first reported in (Dentler and Adams, 1992). A JEOL JEM-1400 Transmission Electron  
704 Microscope equipped with a Lab6 gun was used to acquire images. Images were quantified in  
705 ImageJ.

706

707 *SAG1-HA Immunofluorescence:*

708 Procedure adapted from (Belzile et al., 2013). SAG1-HA cells were grown overnight in M-N  
709 media to induce gametes. These cells were then treated with either 10 $\mu$ M LatB for 1 hour or  
710 250 $\mu$ M CK-666 for 2 hours. Following treatment, mating was induced by adding db-cAMP  
711 (ChemCruz, Santa Cruz, CA) to a final concentration of 13.5mM and incubating for 30 minutes.  
712 Cells were adhered to coverslips and fixed with methanol. Cells were then dried and rehydrated  
713 with PBS and incubated with 100% block (5% BSA, 1% fish gelatin) for 30 minutes. The 100%  
714 block was replaced with new 100% block containing 10% normal goat serum for another 30-  
715 minute incubation. The rabbit anti-HA primary antibody (Cell Signaling, C29F4) was diluted  
716 1:1000 in 20% block in PBS. Coverslips were incubated at 4° Celsius in a humidified chamber  
717 overnight. The primary antibody was removed and washed away with 3 10-minute PBS washes.  
718 The Alexafluor 488-conjugated goat anti-rabbit secondary (Invitrogen, A-10088) was added and  
719 coverslips were incubated at room temperature for 1 hour. This was followed by 3 more 10-  
720 minute PBS washes and finally mounting with Fluoromount-G. Cells were imaged using the  
721 Nikon Spinning Disk Confocal microscope, lens, and software discussed previously. Z-stacks  
722 were obtained, and maximum intensity projections were created for visualization and sum slices  
723 were created for quantification using ImageJ.

724

725 Images were quantified by using line scans from the apex of the cells to the basal region of the  
726 cells farthest away from the apex. Line scans were then normalized, and background subtracted  
727 before being combined into single graphs. Using the line scans, the intensity of signal at the  
728 basal region of the cells was subtracted from the signal at the apical region. Finally, cells with a

729 difference over 30 were considered to be apically enriched and this was quantified as  
730 percentage of cells with apical staining.

731

732 *SAG1-HA western blot:*

733 Procedure adapted from (Belzile et al., 2013). SAG1-HA cells were grown overnight in M-N  
734 media to induce gametes. These cells were then treated with either 10 $\mu$ M LatB for 1 hour or  
735 250 $\mu$ M CK-666 for 2 hours. Following treatment, mating induction was done by adding db-cAMP  
736 (ChemCruz, SC-201567B) to a final concentration of 13.5mM and incubating for 10 minutes.  
737 Cells were then treated with 0.01% trypsin (Sigma, T8003) for 5 minutes, pelleted (at 500xg for  
738 2 minutes), resuspended in lysis buffer (5% glycerol, 1% NP-40, 1mM DTT, 1X protease  
739 inhibitors), and then lysed with bead beating. A western blot was carried out as described above  
740 using rabbit anti-HA primary antibody (Cell Signaling, C29F4) diluted to 1:1000 in 1% BSA, 1%  
741 milk and HRP-conjugated goat anti-rabbit secondary (Thermo, G-21234) diluted to 1:5000 in 1%  
742 milk 1% BSA.

743

744 *Chlamydomonas mating:*

745 SAG1-HA (mating type plus) and *arpc4* mutants (mating type minus) were incubated in M-N  
746 media (minimal media without nitrogen) for 8 hours to induce gamete formation. The two liquid  
747 cultures were then mixed and allowed to incubate under white light without agitation overnight.  
748 The next day the pellicle was transferred to a 4% TAP plate. This was incubated under white  
749 light overnight, then covered in foil and placed in a dark drawer for 5-7 days. After 5-7 days, the  
750 zygospores were transferred individually and manually from the 4% TAP plate to a 1.5% TAP  
751 plate using a dissecting microscope (Zeiss). This plate was incubated in white light overnight.  
752 The following day the zygospores that had split into tetrads were dissected. These were then  
753 allowed to grow before being screened via PCR for a colony containing the *arpc4* mutant and  
754 SAG1-HA.

755

756 *Membrane stain:*

757 Cells were treated with either PitStop2 (Sigma, SML1169) or Dynasore hydrate (Sigma, D7693)  
758 for 1 hour. Meanwhile, FM 4-64FX membrane stain (Invitrogen, F34653) was diluted to a stock  
759 concentration of 200 $\mu$ g/mL. Cells were adhered to poly-lysine coverslips. After a 5-minute  
760 incubation, cells were tilted off and 5 $\mu$ g/mL of ice-cold stain in Hank's Buffered Salt Solution  
761 (HBSS) without magnesium or calcium was added for 1 minute. The stain was tilted off and cells  
762 were fixed with ice cold 4% paraformaldehyde in HBSS without magnesium or calcium for 15  
763 minutes. Coverslips were then rinsed 3 times for 10 minutes each in ice cold HBSS without  
764 magnesium or calcium. Finally, cells were mounted with Fluoromount-G and imaged using the  
765 Nikon Spinning Disk Confocal microscope, lens, and software discussed previously. Z-stacks  
766 were taken and combined into sum projections using ImageJ. The background corrected total  
767 cell fluorescence was then calculated by taking the integrated density and subtracting the sum  
768 of the area and the mean background intensity.

769

770 *Biotin ciliary isolation:*

771 Procedure adapted from (Dentler, 2013). 100mL of cells were grown in TAP for each condition  
772 until they reached an OD<sub>730</sub> of 1.6 or above. Cells were then spun down and resuspended in M1  
773 media and allowed to grow overnight. The next day cells were spun down at 1800rpm for 3  
774 minutes and resuspended in HM Media (10mM HEPES, 5mM MgSO<sub>4</sub>, pH 7.2). Solid biotin  
775 (Thermo, 21335) was added to 20 $\mu$ g/mL for each strain and incubated for 5 minutes with  
776 agitation. Cells were diluted with 10 volumes of fresh M1 media before being spun down at  
777 1800rpm for 3 minutes. After all cells were pelleted, they were washed with fresh M1 media  
778 three times. A pre sample was set aside (100mL) and the remainder of the cells were  
779 resuspended in 4.5 pH M1 media for 45 seconds before being spun down again at 1800rpm for

780 3 minutes. Cells were then resuspended in pH 7.0 media and allowed to regrow their cilia for 4  
781 hours. A sample was taken pre-biotinylation to use as a control for non-specific streptavidin  
782 binding.

783  
784 Meanwhile, the cilia were isolated from the pre sample. The samples were centrifuged for 3  
785 minutes at 1800rpm. Supernatant was drained and each pellet was resuspended in 2 mL of  
786 10mM HEPES (pH 7.4). This was repeated 2 times. Then each pellet was resuspended in 1 mL  
787 of fresh ice-cold 4% HMDS (10mM HEPES pH 7.4, 5mM MgSO<sub>4</sub>, 1mM DTT, 4% w/v sucrose).  
788 Cells were deciliated by incubating with 25mM dibucaine for 2 minutes. Then ice cold HMDS  
789 with 0.5mM EGTA was added (1mL per 1.5mL of cells). This was then centrifuged for 3 minutes  
790 at 1800rpm. Supernatant was collected for each sample. Then HMDS with 25% sucrose was  
791 layered beneath the supernatant (2 mL of 25% HMDS for 1mL of supernatant) to create an  
792 interface. This was centrifuged at 4° Celsius for 10 min at 2400rpm with no brake to avoid  
793 disrupting interface where cilia should now be located. Cilia were removed, pelleted at 21130xg  
794 for 30 minutes, then resuspended in lysis buffer (5% glycerol, 1% NP-40, 1mM DTT, 1X  
795 protease inhibitors). This was repeated with the post samples 4 hours following deciliation.  
796 Protein gel electrophoresis and blotting was performed as described as above using an HRP-  
797 conjugated streptavidin (Thermo, S911).

798  
799 *Homology modeling and sequence studies:*

800 Arp2/3 homology model was created using the Modeller plugin in UCSF Chimera. The template  
801 used was 1U2Z (Nolen et al., 2004; Pettersen et al., 2004; Sali and Blundell, 1993). Percent  
802 identity and similarity is calculated in relation to the human Arp2/3 complex members using a  
803 MUSCLE alignment in Geneious. The homology model was visualized and conservation was  
804 mapped on the protein surface using Chimera (Pettersen et al., 2004).

805  
806 *Statistical analysis:*

807 Statistical analyses were done if GraphPad Prism Version 9. Superplots were created using the  
808 method in (Lord et al., 2020). For any experiments comparing 2 groups (**Figure 3D, 5C, and**  
809 **5E**) an unpaired student's t-test comparing the means of the 3 biological replicates was used to  
810 determine P value. For experiments comparing multiple samples (**Figure 1A, 1B, 1C, 1D, 2B,**  
811 **2C, 3B, and 6E**), an ANOVA was used comparing the means of the 3 biological replicates. This  
812 was followed by a multiple comparisons test (Tukey's). For any percentages shown (**Figure**  
813 **7D**), Chi-squared analysis was performed. For all experiments \*\*\*\* P<0.0001, \*\*\* P<0.001, \*\*  
814 P<0.01, \* P<0.1 with p values listed in the figure legends.

815  
816  
817 **ACKNOWLEDGEMENTS:**

818 Our gratitude to William Dentler for providing expertise especially in looking at the  
819 electron microscopy images and helpful advice, William Snell for providing the SAG1-HA strain,  
820 Masayuki Onishi for the *nap1* strain, Henry Higgs for his feedback on version 1 of the  
821 manuscript, Ann Lavanway for assistance with microscopy, and the Avasthi lab for their help  
822 throughout the project. We also thank David Sept and Courtney M Schroeder for the help with  
823 the original version of this paper and for providing helpful comments.

824 We thank our funding sources including the Madison and Lila Self Graduate Fellowship  
825 at the University of Kansas Medical Center and the MIRA (R35GM128702). Finally, we thank  
826 the BioMT core at Dartmouth College (NIH/NIGMS COBRE award P20-GM113132), the  
827 Genomics and Molecular Biology Shared Resources Core (NCI Cancer Center Support Grant  
828 5P30CA023108-37), and the KIDDRIC NIH U54 HD 090216 at the University of Kansas Medical  
829 Center, Kansas City, KS 66160.

830 The authors have no additional competing financial interests.

831  
832  
833  
834  
835  
836  
837  
838  
839  
840  
841  
842  
843  
844  
845  
846  
847  
848  
849  
850  
851  
852  
853  
854  
855  
856  
857  
858  
859  
860  
861  
862  
863  
864  
865  
866  
867  
868  
869  
870  
871  
872  
873

**AUTHOR CONTRIBUTIONS:**

Brae M Bigge: Conceptualization, data curation, formal analysis, investigation, methodology, visualization, writing (original draft), writing (review & editing)  
Nicholas E Rosenthal: Data curation, formal analysis, writing (review & editing)  
Prachee Avasthi: Conceptualization, funding acquisition, project administration, resources, supervision

**REFERENCES:**

Adams, A.E., Pringle, J.R., 1984. Relationship of actin and tubulin distribution to bud growth in wild-type and morphogenetic-mutant *Saccharomyces cerevisiae*. *J. Cell Biol.* 98, 934–945. <https://doi.org/10.1083/jcb.98.3.934>

Aghamohammadzadeh, S., Ayscough, K.R., 2009. Differential requirements for actin during yeast and mammalian endocytosis. *Nat. Cell Biol.* 11, 1039–1042. <https://doi.org/10.1038/ncb1918>

Avasthi, P., Onishi, M., Karpiak, J., Yamamoto, R., Mackinder, L., Jonikas, M.C., Sale, W.S., Shoichet, B., Pringle, J.R., Marshall, W.F., 2014. Actin Is Required for IFT Regulation in *Chlamydomonas reinhardtii*. *Curr. Biol.* 24, 2025–2032. <https://doi.org/10.1016/j.cub.2014.07.038>

Ayscough, K.R., Stryker, J., Pokala, N., Sanders, M., Crews, P., Drubin, D.G., 1997. High rates of actin filament turnover in budding yeast and roles for actin in establishment and maintenance of cell polarity revealed using the actin inhibitor latrunculin-A. *J. Cell Biol.* 137, 399–416. <https://doi.org/10.1083/jcb.137.2.399>

Basu, R., Munteanu, E.L., Chang, F., 2014. Role of turgor pressure in endocytosis in fission yeast. *Mol. Biol. Cell* 25, 679–687. <https://doi.org/10.1091/mbc.E13-10-0618>

Belzile, O., Hernandez-Lara, C.I., Wang, Q., Snell, W.J., 2013. Regulated membrane protein entry into flagella is facilitated by cytoplasmic microtubules and does not require IFT. *Curr. Biol. CB* 23, 1460–1465. <https://doi.org/10.1016/j.cub.2013.06.025>

Bouck, G.B., 1971. THE STRUCTURE, ORIGIN, ISOLATION, AND COMPOSITION OF THE TUBULAR MASTIGONEMES OF THE *OCHROMONAS* FLAGELLUM. *J. Cell Biol.* 50, 362–384. <https://doi.org/10.1083/jcb.50.2.362>

Campellone, K., Welch, M., 2010. A nucleator arms race: cellular control of actin assembly. *Nat. Rev. Mol. Cell Biol.* 11, 237–251.

Carlsson, A.E., Bayly, P.V., 2014. Force generation by endocytic actin patches in budding yeast. *Biophys. J.* 106, 1596–1606. <https://doi.org/10.1016/j.bpj.2014.02.035>

Cheng, X., Liu, G., Ke, W., Zhao, L., Lv, B., Ma, X., Xu, N., Xia, X., Deng, X., Zheng, C., Huang, K., 2017. Building a multipurpose insertional mutant library for forward and reverse genetics in *Chlamydomonas*. *Plant Methods* 13, 36. <https://doi.org/10.1186/s13007-017-0183-5>

Cochilla, A.J., Angleson, J.K., Betz, W.J., 1999. MONITORING SECRETORY MEMBRANE WITH FM1-43 FLUORESCENCE. *Annu. Rev. Neurosci.* 22, 1–10. <https://doi.org/10.1146/annurev.neuro.22.1.1>



- 874 Craig, E.W., Mueller, D.M., Bigge, B.M., Schaffer, M., Engel, B.D., Avasthi, P., 2019. The elusive  
875 actin cytoskeleton of a green alga expressing both conventional and divergent actins.  
876 Mol. Biol. Cell mbc.E19-03-0141. <https://doi.org/10.1091/mbc.E19-03-0141>
- 877 Dentler, W., 2013. A Role for the Membrane in Regulating Chlamydomonas Flagellar Length.  
878 PLOS ONE 8, e53366. <https://doi.org/10.1371/journal.pone.0053366>
- 879 Dentler, W.L., Adams, C., 1992. Flagellar microtubule dynamics in Chlamydomonas:  
880 cytochalasin D induces periods of microtubule shortening and elongation; and colchicine  
881 induces disassembly of the distal, but not proximal, half of the flagellum. J. Cell Biol.  
882 117, 1289–1298. <https://doi.org/10.1083/jcb.117.6.1289>
- 883 Diener, D.R., Lupetti, P., Rosenbaum, J.L., 2015. Proteomic analysis of isolated ciliary transition  
884 zones reveals the presence of ESCRT proteins. Curr. Biol. CB 25, 379–384.  
885 <https://doi.org/10.1016/j.cub.2014.11.066>
- 886 Farina, F., Gaillard, J., Guérin, C., Couté, Y., Sillibourne, J., Blanchoin, L., Théry, M., 2016. The  
887 centrosome is an actin-organizing centre. Nat. Cell Biol. 18, 65–75.  
888 <https://doi.org/10.1038/ncb3285>
- 889 Gachet, Y., Hyams, J.S., 2005. Endocytosis in fission yeast is spatially associated with the actin  
890 cytoskeleton during polarised cell growth and cytokinesis. J. Cell Sci. 118, 4231–4242.  
891 <https://doi.org/10.1242/jcs.02530>
- 892 Goode, B.L., Eskin, J.A., Wendland, B., 2015. Actin and endocytosis in budding yeast. Genetics  
893 199, 315–358. <https://doi.org/10.1534/genetics.112.145540>
- 894 Gournier, H., Goley, E.D., Niederstrasser, H., Trinh, T., Welch, M.D., 2001. Reconstitution of  
895 Human Arp2/3 Complex Reveals Critical Roles of Individual Subunits in Complex  
896 Structure and Activity. Mol. Cell 8, 1041–1052. [https://doi.org/10.1016/S1097-  
897 2765\(01\)00393-8](https://doi.org/10.1016/S1097-2765(01)00393-8)
- 898 Hetrick, B., Han, M.S., Helgeson, L.A., Nolen, B.J., 2013. Small Molecules CK-666 and CK-869  
899 Inhibit Actin-Related Protein 2/3 Complex by Blocking an Activating Conformational  
900 Change. Chem. Biol. 20, 701–712. <https://doi.org/10.1016/j.chembiol.2013.03.019>
- 901 Hirono, M., Uryu, S., Ohara, A., Kato-Minoura, T., Kamiya, R., 2003. Expression of conventional  
902 and unconventional actins in Chlamydomonas reinhardtii upon deflagellation and sexual  
903 adhesion. Eukaryot. Cell 2, 486–493. <https://doi.org/10.1128/ec.2.3.486-493.2003>
- 904 Hu Qicong, Milenkovic Ljiljana, Jin Hua, Scott Matthew P., Nachury Maxence V., Spiliotis Elias T.,  
905 Nelson W. James, 2010. A Septin Diffusion Barrier at the Base of the Primary Cilium  
906 Maintains Ciliary Membrane Protein Distribution. Science 329, 436–439.  
907 <https://doi.org/10.1126/science.1191054>
- 908 Inoue, D., Obino, D., Pineau, J., Farina, F., Gaillard, J., Guerin, C., Blanchoin, L., Lennon-Duménil,  
909 A.-M., Théry, M., 2019. Actin filaments regulate microtubule growth at the centrosome.  
910 EMBO J. 38. <https://doi.org/10.15252/embj.201899630>
- 911 Jack, B., Avasthi, P., 2018. Erratum to: Chemical Screening for Flagella-Associated Phenotypes in  
912 Chlamydomonas reinhardtii. Methods Mol. Biol. Clifton NJ 1795, E1.  
913 [https://doi.org/10.1007/978-1-4939-7874-8\\_19](https://doi.org/10.1007/978-1-4939-7874-8_19)
- 914 Jack, B., Mueller, D.M., Fee, A.C., Tetlow, A.L., Avasthi, P., 2019. Partially Redundant Actin  
915 Genes in Chlamydomonas Control Transition Zone Organization and Flagellum-Directed  
916 Traffic. Cell Rep. 27, 2459–2467.e3. <https://doi.org/10.1016/j.celrep.2019.04.087>

- 917 Jin, H., White, S.R., Shida, T., Schulz, S., Aguiar, M., Gygi, S.P., Bazan, J.F., Nachury, M.V., 2010.  
918 The conserved Bardet-Biedl syndrome proteins assemble a coat that traffics membrane  
919 proteins to cilia. *Cell* 141, 1208–1219. <https://doi.org/10.1016/j.cell.2010.05.015>
- 920 Kaplan, O.I., Doroquez, D.B., Cevik, S., Bowie, R.V., Clarke, L., Sanders, A.A.W.M., Kida, K.,  
921 Rappoport, J.Z., Sengupta, P., Blacque, O.E., 2012. Endocytosis Genes Facilitate Protein  
922 and Membrane Transport in *C. elegans* Sensory Cilia. *Curr. Biol.* 22, 451–460.  
923 <https://doi.org/10.1016/j.cub.2012.01.060>
- 924 Kato-Minoura, T., Uryu, S., Hirono, M., Kamiya, R., 1998. Highly divergent actin expressed in a  
925 *Chlamydomonas* mutant lacking the conventional actin gene. *Biochem. Biophys. Res.*  
926 *Commun.* 251, 71–76. <https://doi.org/10.1006/bbrc.1998.9373>
- 927 Kiesel, P., Alvarez Viar, G., Tsoy, N., Maraspini, R., Gorilak, P., Varga, V., Honigmann, A., Pigino,  
928 G., 2020. The molecular structure of mammalian primary cilia revealed by cryo-electron  
929 tomography. *Nat. Struct. Mol. Biol.* <https://doi.org/10.1038/s41594-020-0507-4>
- 930 Kim, J., Lee, J.E., Heynen-Genel, S., Suyama, E., Ono, K., Lee, K., Ideker, T., Aza-Blanc, P.,  
931 Gleeson, J.G., 2010. Functional genomic screen for modulators of ciliogenesis and cilium  
932 length. *Nature* 464, 1048–1051. <https://doi.org/10.1038/nature08895>
- 933 Langousis, G., Shimogawa, M.M., Saada, E.A., Vashisht, A.A., Spreafico, R., Nager, A.R., Barshop,  
934 W.D., Nachury, M.V., Wohlschlegel, J.A., Hill, K.L., 2016. Loss of the BBSome perturbs  
935 endocytic trafficking and disrupts virulence of *Trypanosoma brucei*. *Proc. Natl. Acad.*  
936 *Sci. U. S. A.* 113, 632–637. <https://doi.org/10.1073/pnas.1518079113>
- 937 Lefebvre, P.A., 1995. Flagellar amputation and regeneration in *Chlamydomonas*, in: *Methods in*  
938 *Cell Biology*. Elsevier, pp. 3–7.
- 939 Lefebvre, P.A., Nordstrom, S.A., Moulder, J.E., Rosenbaum, J.L., 1978. Flagellar elongation and  
940 shortening in *Chlamydomonas*. IV. Effects of flagellar detachment, regeneration, and  
941 resorption on the induction of flagellar protein synthesis. *J. Cell Biol.* 78, 8–27.  
942 <https://doi.org/10.1083/jcb.78.1.8>
- 943 Li, X., Patena, W., Fauser, F., Jinkerson, R.E., Saroussi, S., Meyer, M.T., Ivanova, N., Robertson,  
944 J.M., Yue, R., Zhang, R., Vilarasa-Blasi, J., Wittkopp, T.M., Ramundo, S., Blum, S.R., Goh,  
945 A., Laudon, M., Srikumar, T., Lefebvre, P.A., Grossman, A.R., Jonikas, M.C., 2019. A  
946 genome-wide algal mutant library and functional screen identifies genes required for  
947 eukaryotic photosynthesis. *Nat. Genet.* 51, 627–635. [https://doi.org/10.1038/s41588-](https://doi.org/10.1038/s41588-019-0370-6)  
948 [019-0370-6](https://doi.org/10.1038/s41588-019-0370-6)
- 949 Lord, S.J., Velle, K.B., Mullins, R.D., Fritz-Laylin, L.K., 2020. SuperPlots: Communicating  
950 reproducibility and variability in cell biology. *J. Cell Biol.* 219.  
951 <https://doi.org/10.1083/jcb.202001064>
- 952 Macia, E., Ehrlich, M., Massol, R., Boucrot, E., Brunner, C., Kirchhausen, T., 2006. Dynasore, a  
953 cell-permeable inhibitor of dynamin. *Dev. Cell* 10, 839–850.  
954 <https://doi.org/10.1016/j.devcel.2006.04.002>
- 955 Milenkovic, L., Scott, M.P., Rohatgi, R., 2009. Lateral transport of Smoothed from the plasma  
956 membrane to the membrane of the cilium. *J. Cell Biol.* 187, 365–374.  
957 <https://doi.org/10.1083/jcb.200907126>
- 958 Molla-Herman, A., Ghossoub, R., Blisnick, T., Meunier, A., Serres, C., Silbermann, F., Emmerson,  
959 C., Romeo, K., Bourdoncle, P., Schmitt, A., Saunier, S., Spassky, N., Bastin, P., Benmerah,



- 960 A., 2010. The ciliary pocket: an endocytic membrane domain at the base of primary and  
961 motile cilia. *J. Cell Sci.* 123, 1785–1795. <https://doi.org/10.1242/jcs.059519>
- 962 Monis, W.J., Faundez, V., Pazour, G.J., 2017. BLOC-1 is required for selective membrane protein  
963 trafficking from endosomes to primary cilia. *J. Cell Biol.* 216, 2131–2150.  
964 <https://doi.org/10.1083/jcb.201611138>
- 965 Mooren Olivia L., Schafer Dorothy A., 2009. Constricting membranes at the nano and micro  
966 scale. *Proc. Natl. Acad. Sci.* 106, 20559–20560.  
967 <https://doi.org/10.1073/pnas.0911630106>
- 968 Nachury, M.V., Loktev, A.V., Zhang, Q., Westlake, C.J., Peränen, J., Merdes, A., Slusarski, D.C.,  
969 Scheller, R.H., Bazan, J.F., Sheffield, V.C., Jackson, P.K., 2007. A Core Complex of BBS  
970 Proteins Cooperates with the GTPase Rab8 to Promote Ciliary Membrane Biogenesis.  
971 *Cell* 129, 1201–1213. <https://doi.org/10.1016/j.cell.2007.03.053>
- 972 Nachury, M.V., Seeley, E.S., Jin, H., 2010. Trafficking to the ciliary membrane: how to get across  
973 the periciliary diffusion barrier? *Annu. Rev. Cell Dev. Biol.* 26, 59–87.  
974 <https://doi.org/10.1146/annurev.cellbio.042308.113337>
- 975 Nolen, B.J., Littlefield, R.S., Pollard, T.D., 2004. Crystal structures of actin-related protein 2/3  
976 complex with bound ATP or ADP. *Proc. Natl. Acad. Sci. U. S. A.* 101, 15627.  
977 <https://doi.org/10.1073/pnas.0407149101>
- 978 Onishi, M., Pecani, K., Jones, T. th, Pringle, J.R., Cross, F.R., 2018. F-actin homeostasis through  
979 transcriptional regulation and proteasome-mediated proteolysis. *Proc Natl Acad Sci U A*  
980 115, E6487–e6496. <https://doi.org/10.1073/pnas.1721935115>
- 981 Onishi, M., Pringle, J.R., Cross, F.R., 2016. Evidence That an Unconventional Actin Can Provide  
982 Essential F-Actin Function and That a Surveillance System Monitors F-Actin Integrity in  
983 *Chlamydomonas*. *Genetics* 202, 977–96. <https://doi.org/10.1534/genetics.115.184663>
- 984 Onishi, M., Umen, J.G., Cross, F.R., Pringle, J.R., 2019. Cleavage-furrow formation without F-  
985 actin in *Chlamydomonas*. *bioRxiv* 789016. <https://doi.org/10.1101/789016>
- 986 Papermaster, D.S., Schneider, B.G., Besharse, J.C., 1985. Vesicular transport of newly  
987 synthesized opsin from the Golgi apparatus toward the rod outer segment.  
988 Ultrastructural immunocytochemical and autoradiographic evidence in *Xenopus*  
989 retinas. *Invest. Ophthalmol. Vis. Sci.* 26, 1386–1404.
- 990 Park, R.J., Shen, H., Liu, L., Liu, X., Ferguson, S.M., De Camilli, P., 2013. Dynamin triple knockout  
991 cells reveal off target effects of commonly used dynamin inhibitors. *J. Cell Sci.* 126,  
992 5305–5312. <https://doi.org/10.1242/jcs.138578>
- 993 Park, T.J., Mitchell, B.J., Abitua, P.B., Kintner, C., Wallingford, J.B., 2008. Dishevelled controls  
994 apical docking and planar polarization of basal bodies in ciliated epithelial cells. *Nat.*  
995 *Genet.* 40, 871–879. <https://doi.org/10.1038/ng.104>
- 996 Pasquale, S.M., Goodenough, U.W., 1987. Cyclic AMP functions as a primary sexual signal in  
997 gametes of *Chlamydomonas reinhardtii*. *J. Cell Biol.* 105, 2279–2292.  
998 <https://doi.org/10.1083/jcb.105.5.2279>
- 999 Pedersen, L.B., Rosenbaum, J.L., 2008. Intraflagellar transport (IFT) role in ciliary assembly,  
1000 resorption and signalling. *Curr. Top. Dev. Biol.* 85, 23–61.  
1001 [https://doi.org/10.1016/S0070-2153\(08\)00802-8](https://doi.org/10.1016/S0070-2153(08)00802-8)

- 1002 Pettersen, E.F., Goddard, T.D., Huang, C.C., Couch, G.S., Greenblatt, D.M., Meng, E.C., Ferrin,  
1003 T.E., 2004. UCSF Chimera--a visualization system for exploratory research and analysis. *J.*  
1004 *Comput. Chem.* 25, 1605–1612. <https://doi.org/10.1002/jcc.20084>
- 1005 Ranjan, P., Awasthi, M., Snell, W.J., 2019. Transient Internalization and Microtubule-Dependent  
1006 Trafficking of a Ciliary Signaling Receptor from the Plasma Membrane to the Cilium.  
1007 *Curr. Biol.* 29, 2942–2947.e2. <https://doi.org/10.1016/j.cub.2019.07.022>
- 1008 Robinson, R.C., Turbedsky, K., Kaiser, D.A., Marchand, J.-B., Higgs, H.N., Choe, S., Pollard, T.D.,  
1009 2001. Crystal Structure of Arp2/3 Complex. *Science* 294, 1679.  
1010 <https://doi.org/10.1126/science.1066333>
- 1011 Rohatgi, R., Snell, W.J., 2010. The ciliary membrane. *Curr. Opin. Cell Biol.* 22, 541–546.  
1012 <https://doi.org/10.1016/j.ceb.2010.03.010>
- 1013 Rosenbaum, J.L., Moulder, J.E., Ringo, D.L., 1969. Flagellar elongation and shortening in  
1014 *Chlamydomonas*. The use of cycloheximide and colchicine to study the synthesis and  
1015 assembly of flagellar proteins. *J. Cell Biol.* 41, 600–619.  
1016 <https://doi.org/10.1083/jcb.41.2.600>
- 1017 Saito, M., Otsu, W., Hsu, K.-S., Chuang, J.-Z., Yanagisawa, T., Shieh, V., Kaitsuka, T., Wei, F.-Y.,  
1018 Tomizawa, K., Sung, C.-H., 2017. Tctex-1 controls ciliary resorption by regulating  
1019 branched actin polymerization and endocytosis. *EMBO Rep.* 18, 1460–1472.  
1020 <https://doi.org/10.15252/embr.201744204>
- 1021 Sali, A., Blundell, T.L., 1993. Comparative protein modelling by satisfaction of spatial restraints.  
1022 *J. Mol. Biol.* 234, 779–815. <https://doi.org/10.1006/jmbi.1993.1626>
- 1023 Spector, I., Shochet, N.R., Blasberger, D., Kashman, Y., 1989. Latrunculins—novel marine  
1024 macrolides that disrupt microfilament organization and affect cell growth: I. Comparison  
1025 with cytochalasin D. *Cell Motil.* 13, 127–144. <https://doi.org/10.1002/cm.970130302>
- 1026 von Loeffelholz, O., Purkiss, A., Cao, L., Kjaer, S., Kogata, N., Romet-Lemonne, G., Way, M.,  
1027 Moores, C.A., 2020. Cryo-EM of human Arp2/3 complexes provides structural insights  
1028 into actin nucleation modulation by ARPC5 isoforms. *bioRxiv* 2020.05.01.071704.  
1029 <https://doi.org/10.1101/2020.05.01.071704>
- 1030 Willox, A.K., Sahraoui, Y.M.E., Royle, S.J., 2014. Non-specificity of Pitstop 2 in clathrin-mediated  
1031 endocytosis. *Biol. Open* 3, 326–331. <https://doi.org/10.1242/bio.20147955>
- 1032 Wingfield, J.L., Mengoni, I., Bomberger, H., Jiang, Y.-Y., Walsh, J.D., Brown, J.M., Picariello, T.,  
1033 Cochran, D.A., Zhu, B., Pan, J., Eggenschwiler, J., Gaertig, J., Witman, G.B., Kner, P.,  
1034 Lehtreck, K., 2017. IFT trains in different stages of assembly queue at the ciliary base  
1035 for consecutive release into the cilium. *eLife* 6, e26609.  
1036 <https://doi.org/10.7554/eLife.26609>
- 1037 Winter, D.C., Choe, E.Y., Li, R., 1999. Genetic dissection of the budding yeast Arp2/3 complex: a  
1038 comparison of the in vivo and structural roles of individual subunits. *Proc. Natl. Acad.*  
1039 *Sci. U. S. A.* 96, 7288–7293. <https://doi.org/10.1073/pnas.96.13.7288>
- 1040 Wood, C.R., Rosenbaum, J.L., 2014. Proteins of the Ciliary Axoneme Are Found on Cytoplasmic  
1041 Membrane Vesicles during Growth of Cilia. *Curr. Biol.* 24, 1114–1120.  
1042 <https://doi.org/10.1016/j.cub.2014.03.047>
- 1043 Wu, C.-T., Chen, H.-Y., Tang, T.K., 2018. Myosin-Va is required for preciliary vesicle  
1044 transportation to the mother centriole during ciliogenesis. *Nat. Cell Biol.* 20, 175–185.  
1045 <https://doi.org/10.1038/s41556-017-0018-7>

1046 Yamada, H., Abe, T., Li, S.-A., Masuoka, Y., Isoda, M., Watanabe, M., Nasu, Y., Kumon, H., Asai,  
1047 A., Takei, K., 2009. Dynasore, a dynamin inhibitor, suppresses lamellipodia formation  
1048 and cancer cell invasion by destabilizing actin filaments. *Biochem. Biophys. Res.*  
1049 *Commun.* 390, 1142–1148. <https://doi.org/10.1016/j.bbrc.2009.10.105>  
1050 Zuo, X., Guo, W., Lipschutz, J.H., 2009. The Exocyst Protein Sec10 Is Necessary for Primary  
1051 Ciliogenesis and Cystogenesis In Vitro. *Mol. Biol. Cell* 20, 2522–2529.  
1052 <https://doi.org/10.1091/mbc.e08-07-0772>  
1053  
1054  
1055  
1056  
1057  
1058  
1059  
1060  
1061  
1062  
1063  
1064  
1065  
1066  
1067  
1068  
1069  
1070  
1071  
1072  
1073  
1074  
1075  
1076  
1077  
1078  
1079  
1080  
1081  
1082  
1083  
1084  
1085  
1086  
1087  
1088  
1089  
1090  
1091  
1092  
1093  
1094  
1095

1096  
1097

**SUPPLEMENTAL MATERIAL:**

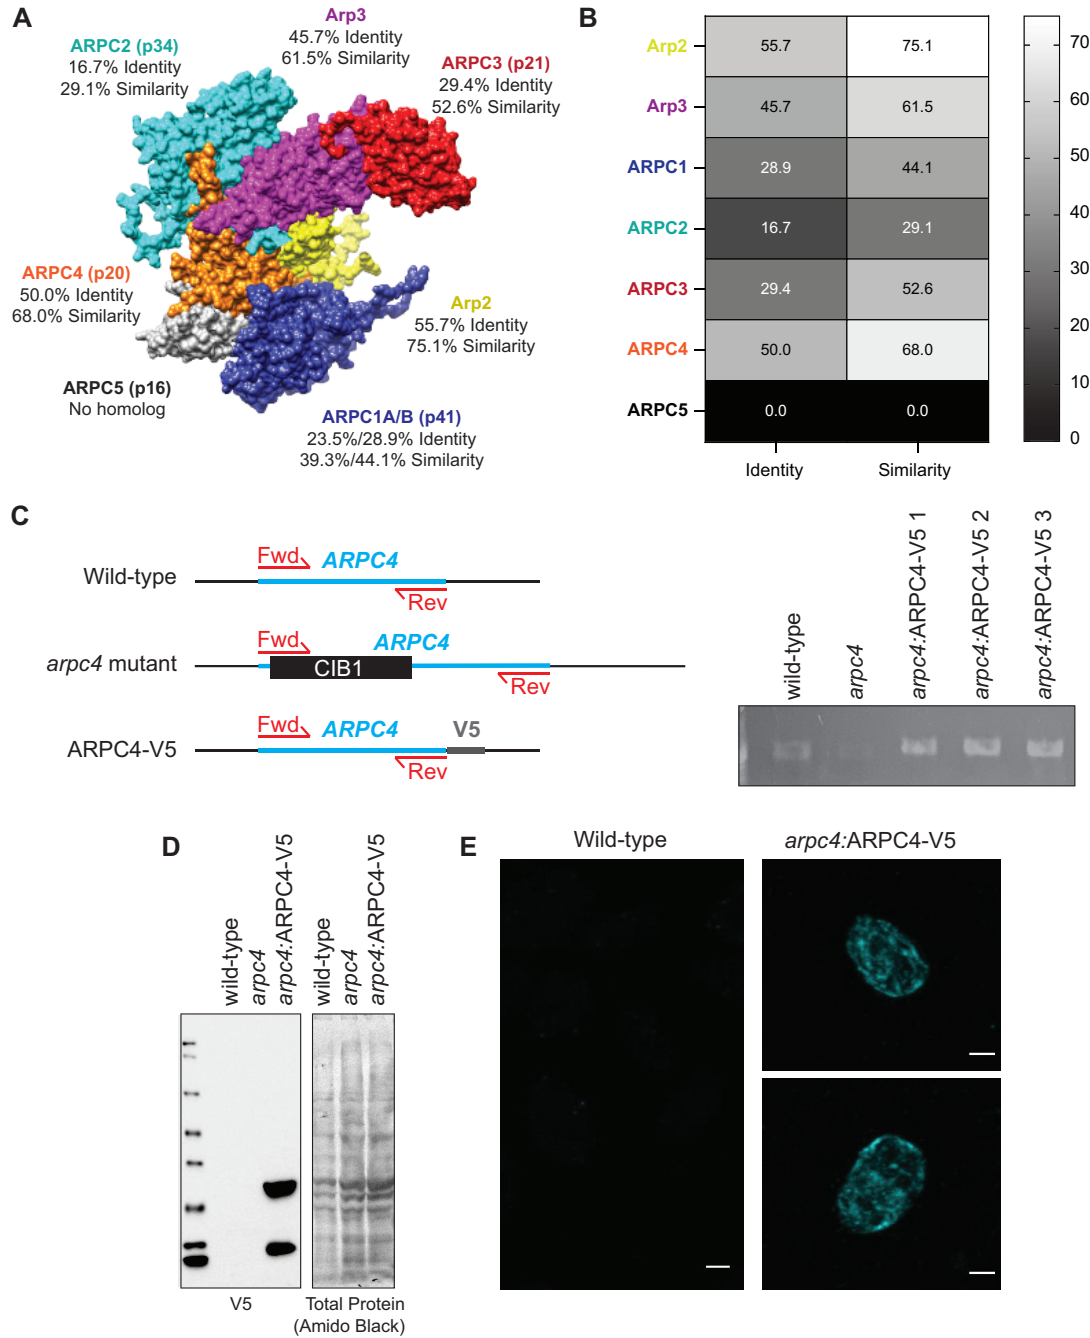

1098  
1099  
1100  
1101  
1102  
1103  
1104  
1105  
1106  
1107  
1108  
1109

**Figure S1. Arp2/3 complex conservation in *Chlamydomonas*.** **A)** Homology model of the *Chlamydomonas* Arp2/3 complex based on the bovine Arp2/3 complex (PDB:1K8K). Percent identity and similarity for the protein sequences of the Arp2/3 complex of *Chlamydomonas* compared to the bovine Arp2/3 complex. **B)** Heatmap of sequence identity and similarity of the Arp2/3 complex members of *Chlamydomonas* compared to those of the bovine complex. The ARPC1 isoform used for comparison was ARPC1B as it was more highly conserved to the *Chlamydomonas* ARPC1. Percentages were determined based on a MUSCLE alignment in Geneious. **C)** Diagram of wild-type ARPC4, mutated ARPC4, and ARPC4-V5 with primer position. PCR gel showing presences of the ARPC4 gene in wild-type and rescue colonies, but not in the arpc4 mutant. **D)** Western blot using V5 antibody (Thermo) showing protein expression of V5 in rescues containing ARPC4-V5. Total protein was probed using amido black. **E)** Immunofluorescence using the V5 antibody (Thermo). Wild-type cells show little to no signal, while cells expressing ARPC4-V5 on the arpc4 mutant background (colony 3) do show diffuse signal, suggesting the ARPC4-V5 is present. Scale bar represents 2µm.

1110  
1111  
1112

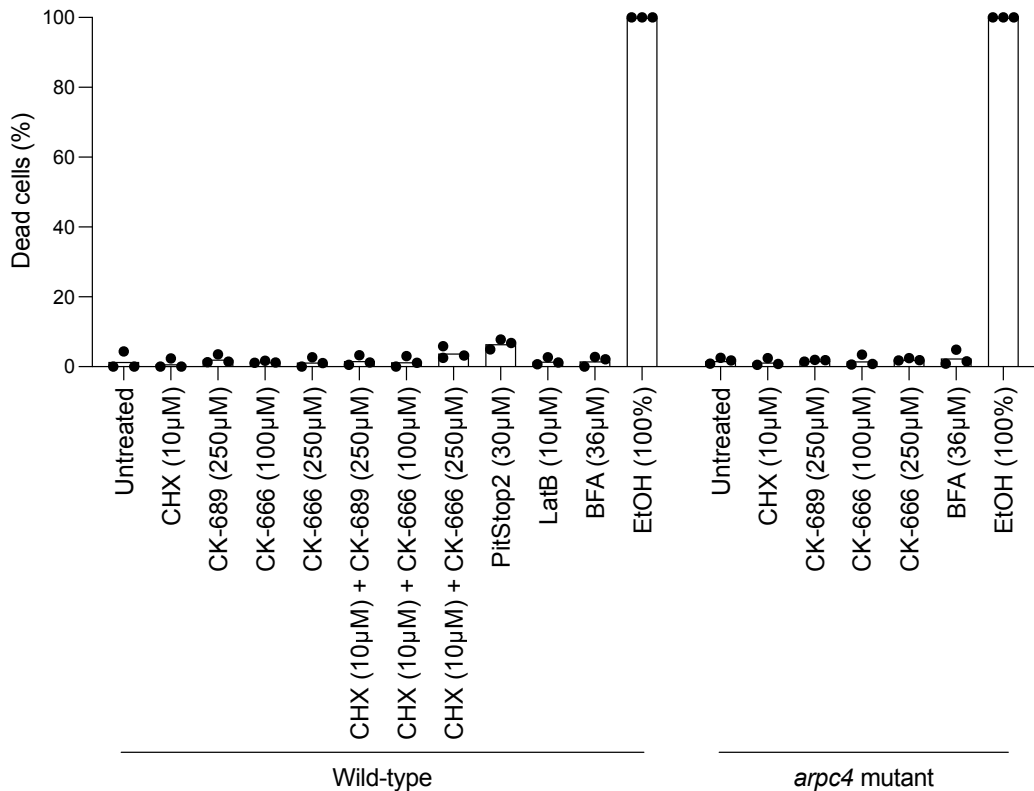

1113  
1114  
1115  
1116  
1117  
1118  
1119  
1120  
1121  
1122

**Figure S2. Health of cells treated with chemical inhibitors.** For each chemical inhibitor throughout the paper cells were stained with sytox to determine health of the cells. Ethanol (EtOH) is used as a positive control as it kills the cells. Cells were treated with LatB or PitStop2 for 1 hour consistent with what was used in the paper. Cells treated with any concentrations of CK-666, CK-689, or CHX were treated for 2 hours consistent with what was used in the paper and when ciliary growth should be complete. Cells treated with BFA were treated for 3 hours consistent with what was used in the paper.  $n > 70$  cells in 3 separate experiments.



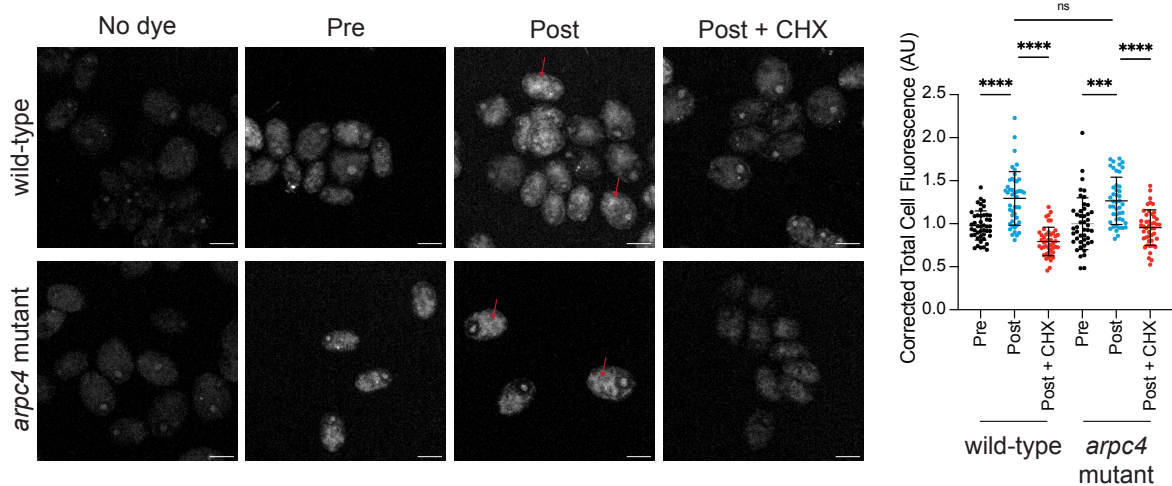

1123  
1124  
1125  
1126  
1127  
1128  
1129  
1130

**Figure S3. Protein synthesis following deciliation is not defective in *arpc4* mutants.** Wild-type and *arpc4* mutant cells were treated with Click-iT OPP either before deciliation, after deciliation and one hour of regrowth, or after deciliation and one hour of regrowth in 10 $\mu$ M CHX which blocks protein translation. Following deciliation there was an increase in fluorescence in cells, particularly around the nucleus (red arrows). The total cell fluorescence was measured and corrected to background then quantified in the graph. n=30 cells per treatment group in 3 separate experiments. \*\*\*\* means P<0.0001. Scale bar represents 5 $\mu$ m.

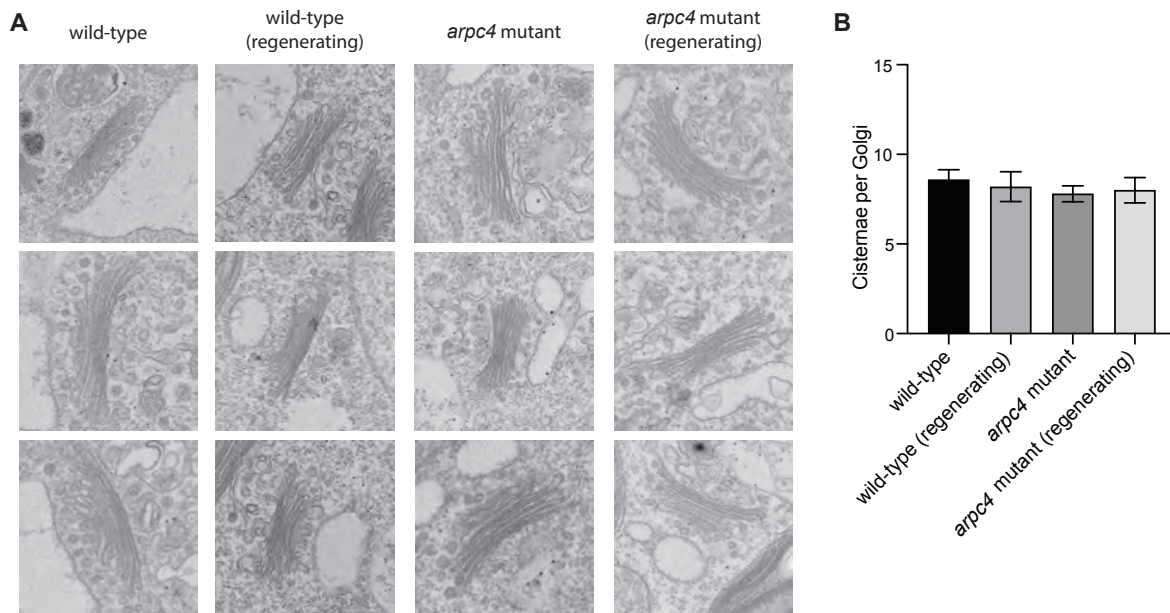

1131  
1132  
1133  
1134  
1135  
1136

**Figure S4. The Arp2/3 complex is not required for Golgi organization.** A) Transmission electron micrographs of Golgi found in wild-type or *arpc4* cells. B) Number of cisternae per Golgi for each condition. n=5. Error bars represent standard deviation.

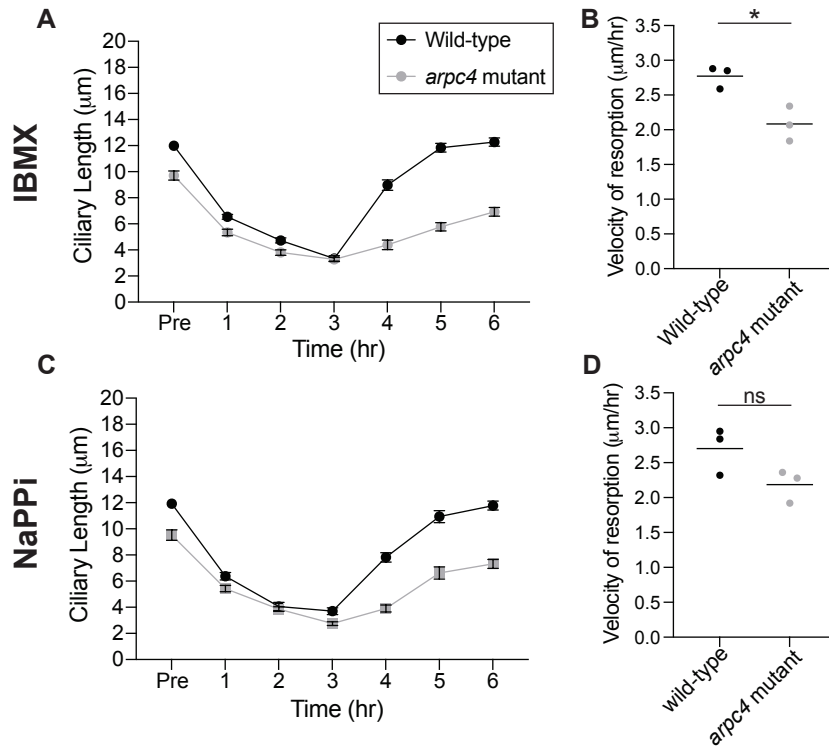

1137  
1138  
1139  
1140  
1141  
1142  
1143  
1144  
1145  
1146  
1147  
1148  
1149

**Figure S5. Resorption of cilia with NaPPI and IBMX is not increased in the *arpc4* mutant as it is with BFA. A)** Cells were treated with 1mM IBMX and allowed to resorb their cilia. After 3 hours, IBMX was washed out and cells were allowed to regrow cilia. n=30 in 3 separate experiments. **B)** The velocity of IBMX resorption was determined by fitting a line to the first 4 points during regeneration and determining the slope in 3 separate experiments. P=0.0158. **C)** Cells were treated with 20mM NaPPI and allowed to resorb their cilia. After 3 hours, NaPPI was washed out and cilia were allowed to regrow. n=30 in 3 separate experiments. **D)** The velocity of NaPPI resorption was determined by fitting a line to the first 4 points of resorption and determining the slope in 3 separate experiments. P=0.0945. The slightly slower velocities of resorption in the *arpc4* mutant may be due to the fact that these cells start with shorter cilia and therefore have less to resorb or it may be due to problems in endocytosis that is thought to be required for resorption of cilia (Saito et al., 2017).
